# **Title**

Effects of Selective Dopamine D<sub>2</sub> or D<sub>3</sub> Receptor Antagonism on Morphine-Induced  
Locomotion in Mice

# **Authors**

Christian A. Botz-Zapp<sup>1</sup>, Stephanie L. Foster<sup>1,2</sup>, Amy H. Newman<sup>3</sup>, David Weinshenker<sup>1</sup>, and  
Daniel F. Manvich<sup>1,4</sup>

# **Affiliations**

<sup>1</sup>Department of Human Genetics, Emory University School of Medicine, Atlanta, GA 30322

<sup>2</sup>Graduate Program in Neuroscience, Emory University, Atlanta, GA 30322

<sup>3</sup>Medicinal Chemistry Section, Molecular Targets and Medications Discovery Branch, National  
Institute on Drug Abuse-Intramural Research Program, National Institutes of Health, Baltimore,  
MD 21224

<sup>4</sup>Current Address: Department of Cell Biology and Neuroscience, Rowan University School of  
Osteopathic Medicine, Stratford, NJ 08084

# **Corresponding Author**

Daniel F. Manvich Ph.D., Department of Cell Biology and Neuroscience, Rowan University  
School of Osteopathic Medicine

Address: 2 Medical Center Drive, Room A204, Stratford, NJ 08084

Phone: (856) 566-6424

Fax: (856) 566-2881

Email: [manvich@rowan.edu](mailto:manvich@rowan.edu)

## **Acknowledgements**

This study was supported by the National Institutes of Health grants F31DA044726 to SLF, ZIADA000424 to AHN, R01DA038453 to DW, and K99DA039991 and R00DA039991 to DFM. The authors thank Ms. J. Cao in the Medicinal Chemistry Section, NIDA-IRP for synthesis of PG01037.

## **Conflict of Interest**

The authors declare that they have no conflicts of interest.

## **Abstract** (250 words or less)

*Rationale:* The dopamine D<sub>3</sub> receptor (D<sub>3</sub>R) has garnered interest as a pharmacotherapeutic target for the treatment of opioid use disorder (OUD). Recent evidence suggests that D<sub>2</sub>R and D<sub>3</sub>R antagonism oppositely affect the locomotor-activating effects of cocaine, but whether this pattern extends to opioid-induced hyperactivity remains unresolved.

*Objective:* This study compared the impact of selective D<sub>2</sub>R vs. D<sub>3</sub>R antagonists on the locomotor-activating effects of acute and repeated morphine administration in mice. Catalepsy following D<sub>2</sub>R vs. D<sub>3</sub>R antagonism alone or in combination with morphine was also assessed.

*Methods:* C57Bl/6J mice were pretreated with either the highly-selective D<sub>3</sub>R antagonist PG01037 (vehicle, 10.0 mg/kg) or the selective D<sub>2</sub>R antagonist L-741,626 (vehicle, 10.0 mg/kg) and tested for 1) locomotor activity induced by acute morphine administration (10.0 – 56.0 mg/kg), 2) locomotor sensitization following repeated morphine administration (56.0 mg/kg), or 3) catalepsy after administration of either antagonist alone or in combination with morphine (10.0 – 56.0 mg/kg).

*Results:* In locomotion studies, both PG01037 and L-741,626 shifted the acute morphine dose-response function rightward/downward, although the inhibitory effect of L-741,626 pretreatment was more robust. Likewise, PG01037 pretreatment partially attenuated, while L-741,626 pretreatment fully abolished, morphine-induced locomotor sensitization. L-741,626 produced

catalepsy that was blunted by morphine, whereas PG01037 did not induce catalepsy under any conditions.

*Conclusions:* D<sub>2</sub>R or D<sub>3</sub>R antagonism attenuates morphine-induced locomotor activity and sensitization. D<sub>2</sub>R antagonism produces a stronger suppression of these effects, but also induced modest cataleptic effects which were not observed following D<sub>3</sub>R antagonism. The results lend additional support to the investigation of selective D<sub>3</sub>R antagonists as treatments for OUD.

*Keywords:* Dopamine, D<sub>3</sub> receptor, D<sub>2</sub> receptor, morphine, PG01037, L-741,626, locomotion, sensitization, opioid abuse, catalepsy

# Introduction

The abuse of prescription and recreational opioids has culminated in a growing national healthcare crisis, with substantial efforts being devoted to the development of novel pharmacotherapeutics that can safely and more effectively reduce opioid misuse and dependence as compared to currently-available medications (Blanco and Volkow 2019; Kreek et al. 2019; Volkow et al. 2019). It is well-established that the abuse-related effects of opioids are mediated largely via their capacity to increase dopamine (DA) neurotransmission within the mesolimbic reward system (for review, see Di Chiara and North 1992; McBride et al. 1999; Pierce and Kumaresan 2006; Reiner et al. 2019; Wise 1989), a projection that arises from DAergic cells located in the ventral tegmental area (VTA) and terminates in the nucleus accumbens (NAc) (Bjorklund and Dunnett 2007; Moore and Bloom 1978). Opioids administered either systemically (Chefer et al. 2003; Gysling and Wang 1983) or directly into the VTA (Devine et al. 1993; Gysling and Wang 1983; Leone et al. 1991; Spanagel et al. 1992) produce increases in NAc DA levels by disinhibiting VTA DA neurons via activation of G<sub>i</sub>-coupled mu opioid receptors located on the cell bodies and terminals of GABAergic neurons that normally provide inhibitory tone (Johnson and North 1992; Matsui and Williams 2011). Accordingly, the locomotor-activating, reinforcing, and reinstatement-inducing effects of systemic or intra-VTA opioid administration may be dampened following perturbation of NAc DA neurotransmission (Hand and Franklin 1985; Kelley et al. 1980; Phillips et al. 1983; Shippenberg et al. 1993; Smith et al. 1985; Spyraki et al. 1983; Stinus et al. 1980; Wang et al. 2003). These results implicate indirect activation of NAc DA transmission as a significant contributor to the abuse-related effects of opioids.

DA binds to five G protein-coupled receptor subtypes which are divided into two families. The D1-like receptor family includes the G<sub>s</sub>-coupled D<sub>1</sub> and D<sub>5</sub> receptor subtypes (D<sub>1</sub>R and D<sub>5</sub>R) while the D2-like receptor family includes the G<sub>i</sub>-coupled D<sub>2</sub>, D<sub>3</sub>, and D<sub>4</sub> receptor subtypes (D<sub>2</sub>R, D<sub>3</sub>R, D<sub>4</sub>R) (Beaulieu and Gainetdinov 2011). Preclinical evidence indicates that antagonism of either D1-like receptors or D2-like receptors reduces opioid-induced locomotor activation, opioid self-administration, and opioid seeking (for review, see Di Chiara and North 1992; Pierce and Kumaresan 2006; Reiner et al. 2019; Wise 1989). However, adverse side effect profiles associated with these subtype-nonselective compounds have hampered their potential clinical utility to treat substance use disorder (Cho et al. 2010; Haney et al. 2001; Kishi et al. 2013; Millan et al. 1995). Thus, attention has shifted towards pharmacological interrogation of the individual subtypes within these receptor families in an effort to maintain or perhaps improve pharmacotherapeutic efficacy for treatment of opioid use disorder (OUD) while reducing undesirable side effects.

In recent years, the D<sub>3</sub>R has emerged as an appealing target in this regard for several reasons (Heidbreder and Newman 2010; Sokoloff and Le Foll 2017). First, the D<sub>3</sub>R exhibits a restricted pattern of expression in the brain, being primarily localized to the NAc and other associated limbic regions (Bouthenet et al. 1991; Heidbreder and Newman 2010; Sokoloff et al. 1990). Second, postmortem studies in humans and animals have revealed that chronic exposure to drugs of abuse including opioids increases D<sub>3</sub>R mRNA expression within components of the mesolimbic DA system including the VTA and NAc (Le Foll et al. 2003; Liang et al. 2011; Spangler et al. 2003; Staley and Mash 1996). Finally, accumulating preclinical evidence suggests that pretreatment with selective D<sub>3</sub>R antagonists attenuates ongoing opioid self-administration under various schedules of reinforcement as well as opioid-seeking behaviors in the general

absence of adverse side effects associated with nonselective D2-like receptor antagonists (Boateng et al. 2015; Galaj et al. 2015; Hu et al. 2013; Jordan et al. 2019; Lv et al. 2019; You et al. 2019). Despite these promising findings, the underlying neuropharmacological mechanisms by which D<sub>3</sub>R antagonism alters the neurochemical and/or behavioral effects of opioids remain largely unresolved.

Stimulation of locomotor activity in rodents is a useful behavioral measure with which to selectively probe NAc DA neurotransmission following systemic administration of drugs of abuse, including opioids (Broekkamp et al. 1979; Delfs et al. 1990; Kalivas et al. 1983; Kelly and Iversen 1976; Kelly et al. 1975). Using locomotor activation as a behavioral proxy for NAc DA signaling, we recently reported that selective D<sub>3</sub>R antagonism enhances, while selective D<sub>2</sub>R antagonism attenuates, cocaine-induced locomotor activity and locomotor sensitization, and these opposite effects on behavior are associated with the unique ability of D<sub>3</sub>R blockade to augment DA-induced excitation of D<sub>1</sub> medium spiny neurons (Manvich et al. 2019). However, whether this pattern of effects extends to other classes of drugs of abuse has not been systematically evaluated. The present study therefore aimed to resolve the impact of D<sub>3</sub>R and D<sub>2</sub>R subtype-selective antagonism upon opioid-induced modulation of locomotor activity. We directly compared the effects of pretreatment with the highly-selective D<sub>3</sub>R antagonist PG01037 (133-fold selectivity for the D<sub>3</sub>R over D<sub>2</sub>R (Grundt et al. 2005)) or the selective D<sub>2</sub>R antagonist L-741,626 (41-fold selectivity for the D<sub>2</sub>R over D<sub>3</sub>R (Kulagowski et al. 1996)) on acute morphine-induced hyperactivity, as well as the induction of sensitization to morphine-induced hyperactivity, in mice. To determine whether nonspecific disruptions of motor function may contribute to any observed reductions of morphine-induced hyperactivity in the present study, we

also assessed whether administration of PG01037 or L-741,626 induces catalepsy when administered either alone or in combination with morphine.



# Materials and methods

## *Subjects*

Subjects used in this study were 56 adult male and female C57BL/6J mice (28/sex, 8-12 weeks old at the start of study) weighing between 19-33 g. 48 mice were ordered from Jackson Laboratory (Bar Harbor, ME) and 8 mice were bred at Emory University. Mice were housed in same-sex groups of 3-5 per cage in a climate-controlled vivarium with a 12-hour light cycle (lights off 7pm: lights on 7am) and had *ad libitum* access to food and water in the home cage. Procedures were conducted in accordance with the NIH Guide for the Care and Use of Laboratory Animals and were approved by the Emory University Institutional Animal Care and Use Committee.

## *Locomotor Activity Apparatus*

Locomotor activity was assessed in transparent polycarbonate cages (22 x 43 x 22 cm) that allowed passage of 8 infrared beams through the long wall and 4 infrared beams through the short wall of the enclosure at 4.9 cm intervals (San Diego Instruments; San Diego, California). Horizontal ambulations, defined as the sequential disruption of two adjacent infrared beams, were recorded in 5-min bins. The test chambers contained a thin layer of clean bedding and were located behind a closed hospital curtain within the animals' housing room. All test sessions were conducted during the light cycle between 0900-1400. Prior to the onset of experiments, mice were injected intraperitoneally (i.p.) with saline and placed in the test chambers for 30 min for 3 consecutive days in order to habituate the mice to injections and the test apparatus.

## *Effects of Selective D<sub>3</sub>R or D<sub>2</sub>R Antagonism on Acute Morphine-Induced Locomotion*

The effects of PG01037 and L-741,626 on acute morphine-induced locomotion were evaluated in separate groups of 8 mice (4 males, 4 females) using a within-subjects design. Animals were initially placed in the center of the locomotor chamber and ambulations were recorded for 90 min. Next, animals were briefly removed from the chamber and administered either PG01037 (vehicle or 10 mg/kg i.p.) or L-741,626 (vehicle or 10 mg/kg i.p.), and returned to the locomotor chamber for an additional 30 min for evaluation of the locomotor response to antagonist administration alone. Finally, mice were again removed from the chamber, injected with morphine (10, 18, or 56 mg/kg i.p.), and placed back in the chamber for 120 min. The 10 mg/kg doses of PG01037 and L-741,626 were carefully selected for use based on our previous work showing that these doses do not appreciably disrupt basal locomotion and are the lowest effective doses capable of significantly modulating the locomotor-activating effects of cocaine in C57BL/6J mice (Manvich et al. 2019). Therefore, these doses were expected *a priori* to demonstrate behavioral effects in the present study while maintaining optimal selectivity for their respective D2-like receptor subtypes. The 10 – 56 mg/kg dose range of morphine was selected based on the results of pilot studies in our laboratory showing that they encompass the ascending limb of the morphine dose-response curve (data not shown). Interaction studies with PG01037 and morphine were completed first in all mice, followed by interaction studies with L-741,626 and morphine. For each interaction study, the order of morphine dose testing was: 18, 56, 10 mg/kg. Administration of the active dose of the antagonist pretreatment or its vehicle were counterbalanced across animals within each dose of morphine. Test sessions were separated by at least 1 week to prevent the development of locomotor sensitization to morphine. All mice received all treatments.

### *Effects of Selective D<sub>3</sub>R or D<sub>2</sub>R Antagonism on Morphine-Induced Locomotor Sensitization*

Sensitization induction took place over 5 consecutive days and was performed in 4 separate groups of mice (n = 8/group, 4 male and 4 female). Mice were initially placed in the center of the locomotor chamber, and locomotor activity was recorded for 90 min. They were then briefly removed from the chamber and administered either PG01037 (vehicle or 10 mg/kg i.p.) or L-741,626 (vehicle or 10 mg/kg i.p.) and returned to the locomotor chamber for 30 min, then were again removed and injected with morphine (56 mg/kg i.p.) and placed back in the chamber for 120 min. Mice received the same pretreatment for each of the 5 test days. Seven days following the last induction session, locomotor activity was again assessed as described above with the exception that all mice received a vehicle injection as the pretreatment 30 min prior to challenge with 56 mg/kg morphine.

### *Effects of Selective D<sub>3</sub>R or D<sub>2</sub>R Antagonism on Catalepsy*

The effects of PG01037 and L-741,626 on catalepsy were studied in two separate groups of mice (n = 8/group, 4 male and 4 female). Mice received a pretreatment of either PG01037 (vehicle, 10 mg/kg i.p.) or L-741,626 (vehicle, 10 mg/kg i.p.) followed 30 min later by administration of 0, 10, or 56 mg/kg morphine. Catalepsy was evaluated using the bar test (Sanberg et al. 1988), during which a thin bar was secured horizontally 1.75" above a flat surface. Each test was conducted by lifting the mouse by the tail and allowing it to grab the bar with its front paws, then releasing the tail so that the mouse was positioned sitting upright on its hind legs. Upon assuming this position, the latency to remove at least one paw from the bar was recorded. The test was stopped if the subject failed to withdraw one paw within 60 s. Mice that could not be placed in the testing position after 3 attempts received a latency score of 0 s. In each

test, catalepsy was measured 0, 15, 30, 60, and 120 min following administration of morphine. The order of dose-combinations was randomized across mice in each group. Mice were tested once per week until each mouse received all treatment combinations. After testing was complete, all mice received a final catalepsy test in which they were administered 3 mg/kg risperidone i.p. followed by saline i.p. 30 min later. Catalepsy in these tests was measured up to 60 min following saline injection. The 3 mg/kg risperidone test was chosen as a positive control because it induces prominent catalepsy in mice (Fink-Jensen et al. 2011).

### *Drugs*

Morphine sulfate (National Institute on Drug Abuse Drug Supply Program, Bethesda, MD) was dissolved in sterile saline. PG01037 was synthesized by Ms. J Cao in the Medicinal Chemistry Section, National Institute on Drug Abuse Intramural Research Program as described previously (Grundt et al. 2005) and dissolved in sterile water. L-741,626 (Tocris Bioscience; Minneapolis, MN) and risperidone (Sigma-Aldrich; St. Louis, MO) were dissolved in vehicle containing ethanol:CremophorEL (Sigma-Aldrich):saline (5:10:85 v/v). All drugs were administered i.p. at a volume of 10 ml/kg.

### *Statistics*

For acute morphine-induced locomotion studies, total ambulations during the 2 h following morphine administration were analyzed via two-way ANOVA with repeated measures on both factors (pretreatment dose x morphine dose) followed by post hoc Holm-Sidak multiple comparisons tests. To assess the effects of either PG01037 or L-741,626 alone on basal locomotor activity over the 30-min period prior to morphine administration, total ambulations in

the 30-min pretreatment window were summed for each mouse, averaged across replicate tests, and analyzed using paired two-tailed t-test. For the induction phase of sensitization studies (i.e. days 1-5), total ambulations during the 2 h following morphine administration were analyzed via mixed two-way ANOVA with repeated measures on one factor (day) and independent measures on the other factor (treatment condition). Dunnett's multiple comparisons tests were used to compare morphine-induced locomotor activity on each of induction days 2-5 vs. morphine-induced locomotor activity on induction day 1. For the challenge day of sensitization studies (day 12), total ambulations during the 2 h following morphine administration were analyzed via independent two-tailed t-test. Latency scores in catalepsy experiments were analyzed using two-way ANOVA with repeated measures on both factors (treatment condition x time), followed by post hoc Bonferroni's test to compare the effects of treatment condition within each time point. The effects of 3 mg/kg risperidone + saline were excluded from statistical analyses since risperidone was included for study only as a positive control to validate the catalepsy detection procedure.

## Results

### *Effects of D<sub>3</sub>R or D<sub>2</sub>R Antagonism on Acute Morphine-Induced Locomotion*

To examine the effects of D<sub>3</sub>R antagonism on acute morphine-induced locomotion, mice were pretreated with the highly-selective D<sub>3</sub>R antagonist PG01037 (vehicle or 10 mg/kg i.p.) 30 min prior to acute administration of morphine (10, 18, or 56 mg/kg i.p.). In the 30 min following PG01037 administration (i.e. prior to morphine administration), paired t-test indicated that 10 mg/kg PG01037 produced a small albeit significant increase in basal locomotor activity as compared to vehicle ( $t_{(7)} = 3.51$ ,  $P = 0.016$ ) (Fig. 1a). The slight increase in locomotion returned to baseline prior to morphine administration at the 120-min time point in each condition (Fig. 2a-c). Morphine produced a robust increase in locomotor activity with dose-dependent maximal magnitudes and durations of action that was attenuated by PG01037 (Fig. 1b, 2a-c). Two-way repeated measures ANOVA indicated significant main effects of morphine dose ( $F_{(2,14)} = 8.21$ ,  $P = 0.004$ ) and PG01037 dose ( $F_{(1,7)} = 27.47$ ,  $P = 0.001$ ) and a significant morphine x PG01037 interaction ( $F_{(2,14)} = 3.81$ ,  $P = 0.048$ ). Post hoc comparisons revealed pretreatment with PG01037 significantly attenuated the locomotor-activating effects of 18 mg/kg by ~ 51% and the locomotor-activating effects of 56 mg/kg morphine by ~ 45% ( $P < 0.05$ ) (Fig. 1b). The inhibitory actions of PG01037 on morphine-induced locomotion emerged within 10-15 min following morphine administration and persisted until either the stimulated locomotor activity ceased (Fig. 2a-b) or until the 2-h observation period elapsed (Fig. 2c).

To determine the effects of D<sub>2</sub>R antagonism on acute morphine-induced locomotion, mice were pretreated with the selective D<sub>2</sub>R antagonist L-741,626 (vehicle or 10 mg/kg i.p.) 30 min prior to acute administration of morphine (10, 18, or 56 mg/kg i.p.). In the 30 min following L-741,626 administration (i.e. prior to morphine administration), 10 mg/kg L-741,626 produced

a small decrease in locomotor activity, but paired t-test indicated that it was not significantly different from vehicle ( $t_{(7)} = 2.31$ ,  $P > 0.05$ ) (Fig. 3a). Morphine administration produced a dose-dependent increase in locomotor activity that was almost completely abolished by L-741,626 (Fig. 3b, Fig. 4a-c). Two-way repeated measures ANOVA indicated significant main effects of morphine dose ( $F_{(2,14)} = 5.55$ ,  $P = 0.017$ ) and L-741,626 dose ( $F_{(1,7)} = 70.44$ ,  $P < 0.0001$ ) but not a significant morphine x L-741,626 interaction ( $F_{(2,14)} = 2.63$ ,  $P = 0.107$ ). Post hoc comparisons revealed that pretreatment with L-741,626 reduced morphine-elicited ambulations between 78-92% as compared to vehicle pretreatment ( $P < 0.0001$ ) (Fig. 3b). In contrast to the effects of PG01037, the inhibitory actions of L-741,626 on morphine-induced locomotion were evident immediately upon morphine administration. Similar to PG01037 however, the effects of L-741,626 persisted throughout the duration of morphine's effects (Fig. 4a-c).

#### *Effects of D<sub>3</sub>R or D<sub>2</sub>R Antagonism on Morphine-Induced Locomotor Sensitization*

To test the impact of selective D<sub>3</sub>R antagonism on the development of morphine-induced locomotor sensitization, mice were pretreated daily for 5 consecutive days with vehicle or PG01037 (10 mg/kg i.p.) 30 min prior to morphine (56 mg/kg, i.p.). Morphine administration produced a sensitized response, as revealed by an increase in locomotion over days, that was attenuated by PG01037 (Fig. 5, 6a-e). Two-way mixed factors ANOVA revealed significant main effects of induction day ( $F_{(4, 56)} = 17.66$ ,  $P < 0.0001$ ) and PG01037 dose ( $F_{(1, 14)} = 4.67$ ,  $P = 0.049$ ), but not a significant day x PG01037 interaction ( $F_{(4, 56)} = 0.51$ ,  $P = 0.73$ ). Post hoc analyses indicated that, collapsed across vehicle and 10 mg/kg PG01037 pretreatments, mice exhibited a sensitized locomotor response to morphine by day 3 of the induction phase (Fig. 5; time course, Fig. 6a-e). Furthermore, the significant main effect of PG01037 treatment without a

significant day x PG01037 interaction suggests that selective D<sub>3</sub>R antagonism attenuated this effect equally across all 5 days, effectively reducing morphine-induced locomotion on average by ~ 36.5% (Fig. 5). One week after the final induction session, all mice received vehicle pretreatment followed by a morphine challenge (56 mg/kg i.p.). Independent t-test showed no difference in locomotor activity between mice that had previously been pretreated with 10 mg/kg PG01037 during induction as compared to mice pretreated with vehicle during induction ( $t_{(14)} = 0.67$ ,  $P = 0.52$ ) (Fig. 5; time course, Fig. 6f).

To assess the impact of selective D<sub>2</sub>R antagonism on morphine-induced locomotor sensitization, mice were pretreated daily for 5 consecutive days with vehicle or L-741,626 (10 mg/kg i.p.) 30 min prior to morphine (56 mg/kg, i.p.). Morphine administration produced a sensitized response, as revealed by an increase in locomotion over days, that was completely abolished by L-741,626 pretreatment (Fig. 7, 8a-e). Two-way mixed factors ANOVA revealed significant main effects of induction day ( $F_{(4, 56)} = 9.87$ ,  $P < 0.0001$ ) and L-741,626 dose ( $F_{(1, 14)} = 35.57$ ,  $P < 0.0001$ ) and a significant day x L-741,626 interaction ( $F_{(4, 56)} = 10.53$ ,  $P < 0.0001$ ). Post hoc analyses indicated that mice pretreated with vehicle prior to morphine exhibited a sensitized locomotor response by day 3 of the induction phase (Fig 7; time course, Fig. 8a-e). However, morphine-induced locomotor sensitization was reduced by > 90% across the entire induction phase in mice pretreated with 10 mg/kg L-741,626 (Fig. 7). One week after the final induction session, all mice received vehicle pretreatment followed by a morphine challenge (56 mg/kg i.p.). Mice that had previously been administered 10 mg/kg L-741,626 daily during the induction phase showed an attenuated locomotor response to morphine challenge as compared to mice pretreated with vehicle during induction sessions ( $t_{(14)} = 3.48$ ,  $P = 0.004$ ). Notably, the



locomotor response on challenge day in L-741,626-treated mice was similar in magnitude (Fig. 7) and time course (Fig. 8f) to vehicle-treated mice on day 1 of the induction phase (Fig. 8a).

### *Effects of D<sub>3</sub>R or D<sub>2</sub>R Antagonism Alone or in Combination with Morphine on Catalepsy*

To test whether selective D<sub>3</sub>R antagonism induced catalepsy, mice were administered vehicle or PG01037 (10 mg/kg i.p.) 30 min prior to morphine (0, 10, 56 mg/kg, i.p.). Neither administration of PG01037 alone, morphine alone, nor their combination resulted in appreciable catalepsy (Fig. 9a). Analysis of these treatment conditions using two-way ANOVA showed no significant main effects of treatment condition ( $F_{(4,28)} = 1.00$ ,  $P = 0.424$ ), time ( $F_{(4,28)} = 1.00$ ,  $P = 0.424$ ), or the treatment condition x time interaction ( $F_{(16,112)} = 1.00$ ,  $P = 0.462$ ). For all mice tested, the latency to withdraw a forepaw in any of the aforementioned conditions did not exceed 1 s. By contrast, 3 mg/kg risperidone produced a robust increase in catalepsy across the 60 min test period, ranging on average from ~ 48 s up to the procedural maximum of 60 s (Fig. 9a).

To test whether selective D<sub>2</sub>R antagonism induced catalepsy, mice were administered vehicle or L-741,626 (10 mg/kg i.p.) 30 min prior to morphine (0, 10, 56 mg/kg, i.p.). As was observed in the PG01037 cohort (Fig. 9a), administration of either 10 or 56 mg/kg morphine alone (i.e. 30 min following vehicle of L-741,626) resulted in forepaw withdrawal latency of < 1 s in all mice tested (Fig 9b). However, administration of 10 mg/kg L-741,626 alone or combined with morphine increased latency scores. Two-way ANOVA revealed significant main effects of treatment condition ( $F_{(4,28)} = 10.13$ ,  $P < 0.0001$ ), time ( $F_{(4,28)} = 7.58$ ,  $P = 0.0003$ ), and a significant treatment condition x time interaction ( $F_{(16,112)} = 5.12$ ,  $P < 0.0001$ ). Post hoc analyses indicated that administration of 10 mg/kg L-741,626 alone (i.e. 30 min prior to saline administration) increased catalepsy as compared to the vehicle + 10 mg/kg morphine or vehicle

+ 56 mg/kg morphine treatment conditions at 30, 60, and 120 min post-morphine injection. The increase in catalepsy produced by L-741,626 was significantly attenuated at the 120 min time point by treatment with either 10 or 56 mg/kg morphine (Fig. 9b). Notably, 3 mg/kg risperidone produced a more robust increase in catalepsy across the 60 min observation period, at levels similar to those observed in the PG01037 cohort (Fig. 9a-b).

## Discussion

The primary objective of the present work was to compare the effects of selective dopamine D<sub>2</sub>R antagonism and selective D<sub>3</sub>R antagonism on the locomotor-activating effects of acutely-administered morphine, as well as on the development of sensitization following repeated morphine administration. Our results indicate that antagonism of either dopamine receptor subtype attenuates acute morphine-induced hyperactivity, although differences were observed with respect to the magnitude of this attenuation. Specifically, pretreatment with the selective D<sub>2</sub>R antagonist L-741,626 fully abolished the locomotor-activating effect of morphine and prevented the development of sensitization, while pretreatment with the selective D<sub>3</sub>R antagonist PG01037 resulted in a significant but partial reduction of morphine-induced hyperlocomotion as compared to that produced by L-741,626 pretreatment. Furthermore, daily pretreatment with PG01037 attenuated, but did not abolish, the locomotor-activating effects of each of five repeated morphine administrations and ultimately did not disrupt the induction of locomotor sensitization.

The present observation that D<sub>2</sub>R antagonism more effectively suppresses the behavioral-stimulant effects of morphine as compared to D<sub>3</sub>R antagonism is in agreement with a few previous studies that have explored this question using pharmacological tools with poorer subtype selectivity. For example, pretreatment with the D<sub>2</sub>-like receptor antagonist eticlopride, which exhibits ~15-fold selectivity for D<sub>2</sub>R vs. D<sub>3</sub>R (Levant 1997), fully abolished morphine-induced hyperlocomotion in mice (Cook and Beardsley 2003), similar to what we observed with the selective D<sub>2</sub>R antagonist L-741,626. By contrast, pretreatment with nafadotride, which exhibits ~10-fold selectivity for D<sub>3</sub>R vs. D<sub>2</sub>R (Audinot et al. 1998), produced a significant but less effective attenuation of morphine-induced hyperlocomotion in the same study (Cook and

Beardsley 2003). A similar pattern of results has also been reported in a comparison between the nonselective D<sub>2</sub>-like receptor antagonist haloperidol and the modestly-selective D<sub>3</sub>R antagonist, U99194A (Manzanedo et al. 1999). To our knowledge, the present study is the first to assess the impact of pretreatment with the selective D<sub>2</sub>R antagonist L-741,626 on the locomotor-activating effects of morphine, which is notable given that L-741,626 is presently considered to be among the most selective D<sub>2</sub>R antagonists available for *in vivo* preclinical investigation. Our results suggest that the robust attenuation of morphine-induced locomotion previously observed with nonselective D<sub>2</sub>-like receptor antagonism is primarily attributable to blockade of the D<sub>2</sub>R subtype. Moreover, our finding that pretreatment with the selective D<sub>3</sub>R antagonist PG01037 produces a significant, albeit weaker, attenuation of morphine-induced locomotion is in accord with a number of recent studies that also demonstrate modest reductions of the locomotor-activating effects of opioids following pretreatment with other highly-selective D<sub>3</sub>R antagonists (Kumar et al. 2016; Lv et al. 2019; You et al. 2017). Based on these prior findings and our present results with PG01037 and L-741,626, we conclude that D<sub>3</sub>R antagonism and D<sub>2</sub>R antagonism exert qualitatively similar reductions of morphine-induced hyperlocomotion, however a pharmacological shift away from D<sub>3</sub>R selectivity towards either nonselective antagonism or selective D<sub>2</sub>R antagonism renders this modulation far more robust.

It could be argued that the attenuation of morphine-induced hyperactivity following PG01037 pretreatment may have been more effective had higher doses of PG01037 been tested. Although we cannot presently rule out this consideration entirely, this seems unlikely for several reasons. First, the dose of 10 mg/kg PG01037 used in these studies was carefully selected based on our previous finding that 10 mg/kg is the lowest dose that produces significant modulation of cocaine-induced locomotion in C57Bl/6J (Manvich et al. 2019). Second, we tested higher doses

of PG01037 (up to 30 mg/kg) and did not find them to be more efficacious than 10 mg/kg (unpublished observations). Finally, testing higher doses of PG01037 runs the risk of exerting larger effects on basal locomotion and/or limiting D<sub>3</sub>R vs. D<sub>2</sub>R selectivity *in vivo*, each of which would undoubtedly confound the interpretations of the data. Based on these considerations, our strategy in the present experiments was to assess the effects of the lowest behaviorally-relevant dose of PG01037 (10 mg/kg) in order to maintain maximal D<sub>3</sub>R vs. D<sub>2</sub>R selectivity. A similar strategy was employed in selecting the dose of L-741,626, inasmuch as 10 mg/kg is the lowest pretreatment dose to significantly alter cocaine-induced locomotion in C57BL/6J mice (Manvich et al. 2019). It could also be suggested that testing lower doses of L-741,626 may have resulted in a partial attenuation of morphine-induced hyperactivity akin to what was observed following PG01037 pretreatment, however this too seems unlikely given that reducing the dose of L-741,626 one-half log step to 3 mg/kg renders this compound ineffective in modulating cocaine-induced locomotor activity (Manvich et al. 2019). Our studies were therefore designed to investigate optimal doses of both PG01037 and L-741,626 that achieve the goal of assessing selective D<sub>3</sub>R vs. selective D<sub>2</sub>R antagonism.

Not only did D<sub>2</sub>R antagonism abolish morphine-induced locomotion, but it also prevented the development of locomotor sensitization. By contrast, D<sub>3</sub>R antagonism attenuated acute morphine-induced locomotion but evidently did not prevent the induction of sensitization, since mice appeared sensitized when challenged with morphine alone 1 week after the last drug combination was administered. The reasons for these discrepant effects remain unclear. One possible explanation is that systemic D<sub>2</sub>R blockade disrupts the neurobiological adaptations underlying sensitization to opioid-induced locomotion, while systemic D<sub>3</sub>R blockade does not. It is generally accepted that changes in mesolimbic DA neurotransmission mediate opioid-induced

locomotor sensitization, and that the primary site at which these neuroadaptations take place is the VTA (Kalivas and Duffy 1987; Vanderschuren and Kalivas 2000; Vezina et al. 1987).

Although both D<sub>2</sub>Rs and D<sub>3</sub>Rs are expressed as autoreceptors within the VTA (Beaulieu and Gainetdinov 2011; Diaz et al. 2000; Lejeune and Millan 1995; Mercuri et al. 1997; Missale et al. 1998), it is possible that they differentially modulate the development of opioid-induced sensitization via distinct neuropharmacological effects that are not yet fully understood. While the NAc does not play a prominent role in the induction of opioid-induced locomotor sensitization (Vanderschuren and Kalivas 2000; Vezina et al. 1987), it is known to play a role in the locomotor-activating effects of acute systemic morphine administration (Schiltein et al. 1998; Teitelbaum et al. 1979; Vaccarino and Corrigall 1987; Vezina et al. 1987), and intra-NAc administration of the highly-selective D<sub>3</sub>R antagonist SB-277011A has been reported to attenuate the *expression* of morphine-induced locomotor sensitization (Liang et al. 2011).

Therefore, our finding that systemic D<sub>3</sub>R antagonism attenuates the acute locomotor-activating effects of morphine but does not alter induction of sensitization to this phenomenon could be due to differential modulatory impacts on neural activity within the NAc and VTA, respectively. Consequently, D<sub>3</sub>R antagonism may “mask” the overt appearance of sensitization during the induction phase due to its capacity to attenuate morphine-induced hyperactivity, but the development of the underlying sensitization can be “unmasked” and observed when morphine is tested in the absence of D<sub>3</sub>R antagonism. It is noteworthy that this hypothesis is in conflict with a recent report that pretreatment with the highly-selective D<sub>3</sub>R antagonist VK4-116 attenuated the induction of oxycodone-induced locomotor sensitization (Kumar et al. 2016) as assessed by a challenge test with oxycodone alone. However, some key procedural differences may underlie these discrepant findings including the use of different opioids (morphine vs. oxycodone), use of

different D<sub>3</sub>R antagonists (PG01037 vs. VK4-116), and imposition of 7 days vs. 2 days between the final induction session and the expression test.

A clear distinction can be drawn from our results between the impact of D<sub>3</sub>R antagonism and D<sub>2</sub>R antagonism on morphine-induced hyperactivity, as the combination of the D<sub>2</sub>R antagonist L-741,626 with morphine resulted in a dramatic and sustained loss of locomotion that was not evident following the combination of the D<sub>3</sub>R antagonist PG01037 with morphine. We suspected that the pronounced reduction in locomotion following combined administration of L-741,626 with morphine may be due in part to the emergence of catalepsy, based on the findings that combined administration of nonselective D<sub>2</sub>-like receptor antagonists with opioids induces catalepsy (Kiritsy-Roy et al. 1989; Rodriguez-Arias et al. 2000) and administration of L-741,626 alone has been found to induce catalepsy in squirrel monkeys (Achat-Mendes et al. 2010), rats (Millan et al. 2000), and mice (Hattori et al. 2006). However, to our knowledge, the cataleptic effects of combined administration of a selective D<sub>2</sub>R antagonist such as L-741,626 with morphine had not been investigated prior to the present work. Our results replicate the previous finding that L-741,626 pretreatment alone is sufficient to induce a modest cataleptic effect 1 h after its administration in mice (Hattori et al. 2006). Interestingly however, we found that co-administration of moderate doses of morphine that fail to induce catalepsy alone (but which promote hyperactivity) attenuated, rather than potentiated, the cataleptic effects of L-741,626 120 min after morphine administration. Moreover, we note that the locomotor-activating effects of morphine are disrupted as early as 30 min after L-741,626 administration, a time point at which its cataleptic effects are nonsignificant. Given these pieces of evidence, we conclude that the emergence of a cataleptic state does not underlie the robust suppression of morphine-induced hyperactivity following L-741,626 pretreatment. Nevertheless, the cataleptic effects exhibited by

the selective D<sub>2</sub>R antagonist L-741,626 suggest that catalepsy (and possibly other adverse motoric/extrapyramidal effects) induced by nonselective D<sub>2</sub>-like receptor antagonists are mediated by blockade of the D<sub>2</sub>R subtype. By contrast, PG01037 showed no cataleptic effects in this study at a dose which significantly modulated morphine-induced hyperactivity. This finding is in agreement with previous reports that catalepsy is not observed in rodents following pretreatment with other selective D<sub>3</sub>R antagonists, S33084 (Millan et al. 2000) and SB-277011A (Reavill et al. 2000). However, it should be pointed out that ours is the first study to assess catalepsy following combined administration of a highly-selective D<sub>3</sub>R antagonist and an opioid. Given that D<sub>3</sub>R antagonists are being considered as potential pharmacotherapeutics for OUD, the lack of measurable catalepsy following D<sub>3</sub>R antagonism alone or in combination with morphine adds to accumulating evidence that D<sub>3</sub>R antagonists exhibit a desirable safety profile as compared to nonselective D<sub>2</sub>-like receptor antagonists or D<sub>2</sub>R-selective antagonists, even when opioids are concurrently administered (Jordan et al 2019).

One key question remaining is how pretreatment with a D<sub>3</sub>R antagonist attenuates opioid-induced hyperactivity (present results) but potentiates cocaine-induced hyperactivity (Manvich et al. 2019). This remains an elusive question that will require further investigation to clarify. The enhancement of cocaine-induced locomotion by D<sub>3</sub>R antagonism occurs coincidentally with an increase in DA-induced excitability and activity of DA D<sub>1</sub> receptor-expressing medium spiny neurons within the NAc (Manvich et al. 2019). However, this mechanism is unlikely to explain the attenuation of morphine-induced locomotion by D<sub>3</sub>R antagonism because i.c.v infusion of the D<sub>1</sub>-like receptor agonist SKF38393 enhances, rather than attenuates, morphine-induced hyperactivity in mice (Funada et al. 1994). There are some notable disparities between hyperactivity produced by opioids vs. psychostimulants that may partially or wholly explain the



bidirectional effect of D<sub>3</sub>R antagonism. For example, cocaine increases locomotion in a DA-dependent manner via blockade of the dopamine reuptake transporter (DAT) and a consequent rise in extracellular DA levels within the NAc (Giros et al. 1996; Ritz et al. 1987; Yamamoto et al. 2013). By contrast, opioid receptor agonists like morphine are capable of increasing locomotion via both DA-dependent and DA-independent processes. More specifically, intra-VTA opioid receptor agonist administration induces locomotor activity via disinhibition of DAergic neurons, and as such requires an intact mesolimbic DA projection (Devine et al. 1993; Gysling and Wang 1983; Johnson and North 1992; Matsui and Williams 2011; Spanagel et al. 1992). By contrast, intra-NAc opioid receptor agonists induce locomotion via direct actions on NAc medium spiny neurons, an effect that does not require intact DA neurotransmission (Churchill and Kalivas 1992; Kalivas et al. 1983; Pert and Sivit 1977; Stinus et al. 1985). Collectively, our prior and current findings may therefore indicate that D<sub>3</sub>R antagonism potentiates drug-induced hyperactivity that is DA-dependent, but attenuates drug-induced hyperactivity that is DA-independent. This hypothesis is further supported by the findings that intra-NAc administration of a selective D<sub>3</sub>R antagonist potentiates the locomotor-activating effects of cocaine (Manvich et al. 2019), but attenuates the locomotor-activating effects of morphine (Liang et al. 2011). Alternatively, the temporal patterns of cocaine-induced vs. morphine-induced increases in NAc DA are different (Di Chiara and Imperato 1988; Pontieri et al. 1995; Rouge-Pont et al. 2002; Sorge and Stewart 2006; Zocchi et al. 2003), likely owing to their dependence upon DAT inhibition vs. VTA DA neuron disinhibition respectively, and it is plausible that these temporally-distinct influences on DA signaling may be differentially modulated by D<sub>3</sub>R antagonism. Still another potential explanation for the opposing influence of D<sub>3</sub>R antagonism on stimulant- vs. opioid-induced hyperactivity may be that the reliance of

cocaine and related psychostimulants on the DAT to induce increases in locomotion renders them potentially susceptible to neuropharmacological modulation by recently-described direct interactions between DAT and the D<sub>3</sub>R (Castro-Hernandez et al. 2015; McGinnis et al. 2016; Zapata et al. 2007). By contrast, DAT/D<sub>3</sub>R interactions would not be predicted to play a role in the DA-independent drivers of opioid-induced locomotion since they do not require functional DAergic terminals to exert their behavioral effects (Churchill and Kalivas 1992; Kalivas et al. 1983; Stinus et al. 1985). At present, such hypotheses remain speculative and additional studies will be required to elucidate the specific mechanisms and neuroanatomical substrates underlying the ability of D<sub>3</sub>R antagonism to oppositely modulate the locomotor-activating effects of cocaine and morphine, as well as determine whether these observed differences extend to other drugs within the classes of psychostimulants and opioids.

In summary, we report here that pretreatment with either the highly-selective D<sub>3</sub>R antagonist PG01037 or the selective D<sub>2</sub>R antagonist L-741,626 attenuates morphine-induced increases in locomotor activity in mice. D<sub>2</sub>R antagonism resulted in a far greater suppression of morphine-induced locomotion as compared to D<sub>3</sub>R antagonism and fully prevented the induction of sensitization to morphine's locomotor-activating effects, but also exhibited undesirable cataleptic effects that were not produced by doses of PG01037 which significantly affected morphine-induced hyperactivity. Taken together, these findings lend further support to the potential use and safety of D<sub>3</sub>R antagonists in the treatment of OUD.

## References

- Achat-Mendes C, Grundt P, Cao J, Platt DM, Newman AH, Spealman RD (2010) Dopamine D3 and D2 receptor mechanisms in the abuse-related behavioral effects of cocaine: studies with preferential antagonists in squirrel monkeys. *J Pharmacol Exp Ther* 334: 556-65.
- Audinot V, Newman-Tancredi A, Gobert A, Rivet JM, Brocco M, Lejeune F, Gluck L, Desposte I, Bervoets K, Dekeyne A, Millan MJ (1998) A comparative in vitro and in vivo pharmacological characterization of the novel dopamine D3 receptor antagonists (+)-S 14297, nafadotride, GR 103,691 and U 99194. *J Pharmacol Exp Ther* 287: 187-97.
- Beaulieu JM, Gainetdinov RR (2011) The physiology, signaling, and pharmacology of dopamine receptors. *Pharmacol Rev* 63: 182-217.
- Bjorklund A, Dunnett SB (2007) Dopamine neuron systems in the brain: an update. *Trends Neurosci* 30: 194-202.
- Blanco C, Volkow ND (2019) Management of opioid use disorder in the USA: present status and future directions. *Lancet* 393: 1760-1772.
- Boateng CA, Bakare OM, Zhan J, Banala AK, Burzynski C, Pommier E, Keck TM, Donthamsetti P, Javitch JA, Rais R, Slusher BS, Xi ZX, Newman AH (2015) High Affinity Dopamine D3 Receptor (D3R)-Selective Antagonists Attenuate Heroin Self-Administration in Wild-Type but not D3R Knockout Mice. *J Med Chem* 58: 6195-213.
- Bouthenet ML, Souil E, Martres MP, Sokoloff P, Giros B, Schwartz JC (1991) Localization of dopamine D3 receptor mRNA in the rat brain using in situ hybridization histochemistry: comparison with dopamine D2 receptor mRNA. *Brain Res* 564: 203-19.
- Broekkamp CL, Phillips AG, Cools AR (1979) Stimulant effects of enkephalin microinjection into the dopaminergic A10 area. *Nature* 278: 560-2.
- Castro-Hernandez J, Afonso-Oramas D, Cruz-Muros I, Salas-Hernandez J, Barroso-Chinea P, Moratalla R, Millan MJ, Gonzalez-Hernandez T (2015) Prolonged treatment with pramipexole promotes physical interaction of striatal dopamine D3 autoreceptors with dopamine transporters to reduce dopamine uptake. *Neurobiol Dis* 74: 325-35.
- Chefer VI, Kieffer BL, Shippenberg TS (2003) Basal and morphine-evoked dopaminergic neurotransmission in the nucleus accumbens of MOR- and DOR-knockout mice. *Eur J Neurosci* 18: 1915-22.
- Cho DI, Zheng M, Kim KM (2010) Current perspectives on the selective regulation of dopamine D(2) and D(3) receptors. *Arch Pharm Res* 33: 1521-38.
- Churchill L, Kalivas PW (1992) Dopamine depletion produces augmented behavioral responses to a mu-, but not a delta-opioid receptor agonist in the nucleus accumbens: lack of a role for receptor upregulation. *Synapse* 11: 47-57.
- Cook CD, Beardsley PM (2003) The modulatory actions of dopamine D2/3 agonists and antagonists on the locomotor-activating effects of morphine and caffeine in mice. *Pharmacol Biochem Behav* 75: 363-71.
- Delfs JM, Schreiber L, Kelley AE (1990) Microinjection of cocaine into the nucleus accumbens elicits locomotor activation in the rat. *J Neurosci* 10: 303-10.
- Devine DP, Leone P, Pocock D, Wise RA (1993) Differential involvement of ventral tegmental mu, delta and kappa opioid receptors in modulation of basal mesolimbic dopamine release: in vivo microdialysis studies. *J Pharmacol Exp Ther* 266: 1236-46.

- Di Chiara G, Imperato A (1988) Drugs abused by humans preferentially increase synaptic dopamine concentrations in the mesolimbic system of freely moving rats. *Proc Natl Acad Sci U S A* 85: 5274-8.
- Di Chiara G, North RA (1992) Neurobiology of opiate abuse. *Trends Pharmacol Sci* 13: 185-93.
- Diaz J, Pilon C, Le Foll B, Gros C, Triller A, Schwartz JC, Sokoloff P (2000) Dopamine D3 receptors expressed by all mesencephalic dopamine neurons. *J Neurosci* 20: 8677-84.
- Fink-Jensen A, Schmidt LS, Dencker D, Schulein C, Wess J, Wortwein G, Woldbye DP (2011) Antipsychotic-induced catalepsy is attenuated in mice lacking the M4 muscarinic acetylcholine receptor. *Eur J Pharmacol* 656: 39-44.
- Funada M, Suzuki T, Misawa M (1994) The role of dopamine D1-receptors in morphine-induced hyperlocomotion in mice. *Neurosci Lett* 169: 1-4.
- Galaj E, Manuszak M, Babic S, Ananthan S, Ranaldi R (2015) The selective dopamine D3 receptor antagonist, SR 21502, reduces cue-induced reinstatement of heroin seeking and heroin conditioned place preference in rats. *Drug Alcohol Depend* 156: 228-233.
- Giros B, Jaber M, Jones SR, Wightman RM, Caron MG (1996) Hyperlocomotion and indifference to cocaine and amphetamine in mice lacking the dopamine transporter. *Nature* 379: 606-12.
- Grundt P, Carlson EE, Cao J, Bennett CJ, McElveen E, Taylor M, Luedtke RR, Newman AH (2005) Novel heterocyclic trans olefin analogues of N-{4-[4-(2,3-dichlorophenyl)piperazin-1-yl]butyl}arylcarboxamides as selective probes with high affinity for the dopamine D3 receptor. *J Med Chem* 48: 839-48.
- Gysling K, Wang RY (1983) Morphine-induced activation of A10 dopamine neurons in the rat. *Brain Res* 277: 119-27.
- Hand TH, Franklin KB (1985) 6-OHDA lesions of the ventral tegmental area block morphine-induced but not amphetamine-induced facilitation of self-stimulation. *Brain Res* 328: 233-41.
- Haney M, Ward AS, Foltin RW, Fischman MW (2001) Effects of ecopipam, a selective dopamine D1 antagonist, on smoked cocaine self-administration by humans. *Psychopharmacology (Berl)* 155: 330-7.
- Hattori K, Uchino S, Isosaka T, Maekawa M, Iyo M, Sato T, Kohsaka S, Yagi T, Yuasa S (2006) Fyn is required for haloperidol-induced catalepsy in mice. *J Biol Chem* 281: 7129-35.
- Heidbreder CA, Newman AH (2010) Current perspectives on selective dopamine D(3) receptor antagonists as pharmacotherapeutics for addictions and related disorders. *Ann N Y Acad Sci* 1187: 4-34.
- Hu R, Song R, Yang R, Su R, Li J (2013) The dopamine D(3) receptor antagonist YQA14 that inhibits the expression and drug-prime reactivation of morphine-induced conditioned place preference in rats. *Eur J Pharmacol* 720: 212-7.
- Johnson SW, North RA (1992) Opioids excite dopamine neurons by hyperpolarization of local interneurons. *J Neurosci* 12: 483-8.
- Jordan CJ, Humburg B, Rice M, Bi GH, You ZB, Shaik AB, Cao J, Bonifazi A, Gadiano A, Rais R, Slusher B, Newman AH, Xi ZX (2019) The highly selective dopamine D3R antagonist, R-VK4-40 attenuates oxycodone reward and augments analgesia in rodents. *Neuropharmacology* 158: 107597.
- Kalivas PW, Duffy P (1987) Sensitization to repeated morphine injection in the rat: possible involvement of A10 dopamine neurons. *J Pharmacol Exp Ther* 241: 204-12.

- Kalivas PW, Widerlov E, Stanley D, Breese G, Prange AJ, Jr. (1983) Enkephalin action on the mesolimbic system: a dopamine-dependent and a dopamine-independent increase in locomotor activity. *J Pharmacol Exp Ther* 227: 229-37.
- Kelley AE, Stinus L, Iversen SD (1980) Interactions between D-ala-met-enkephalin, A10 dopaminergic neurones, and spontaneous behaviour in the rat. *Behav Brain Res* 1: 3-24.
- Kelly PH, Iversen SD (1976) Selective 6OHDA-induced destruction of mesolimbic dopamine neurons: abolition of psychostimulant-induced locomotor activity in rats. *Eur J Pharmacol* 40: 45-56.
- Kelly PH, Seviour PW, Iversen SD (1975) Amphetamine and apomorphine responses in the rat following 6-OHDA lesions of the nucleus accumbens septi and corpus striatum. *Brain Res* 94: 507-22.
- Kiritsy-Roy JA, Standish SM, Terry LC (1989) Dopamine D-1 and D-2 receptor antagonists potentiate analgesic and motor effects of morphine. *Pharmacol Biochem Behav* 32: 717-21.
- Kishi T, Matsuda Y, Iwata N, Correll CU (2013) Antipsychotics for cocaine or psychostimulant dependence: systematic review and meta-analysis of randomized, placebo-controlled trials. *J Clin Psychiatry* 74: e1169-80.
- Kreek MJ, Reed B, Butelman ER (2019) Current status of opioid addiction treatment and related preclinical research. *Sci Adv* 5: eaax9140.
- Kulagowski JJ, Broughton HB, Curtis NR, Mawer IM, Ridgill MP, Baker R, Emms F, Freedman SB, Marwood R, Patel S, Patel S, Ragan CI, Leeson PD (1996) 3-((4-(4-Chlorophenyl)piperazin-1-yl)-methyl)-1H-pyrrolo-2,3-b-pyridine: an antagonist with high affinity and selectivity for the human dopamine D4 receptor. *J Med Chem* 39: 1941-2.
- Kumar V, Bonifazi A, Ellenberger MP, Keck TM, Pommier E, Rais R, Slusher BS, Gardner E, You ZB, Xi ZX, Newman AH (2016) Highly Selective Dopamine D3 Receptor (D3R) Antagonists and Partial Agonists Based on Eticlopride and the D3R Crystal Structure: New Leads for Opioid Dependence Treatment. *J Med Chem* 59: 7634-50.
- Le Foll B, Diaz J, Sokoloff P (2003) Increased dopamine D3 receptor expression accompanying behavioral sensitization to nicotine in rats. *Synapse* 47: 176-83.
- Lejeune F, Millan MJ (1995) Activation of dopamine D3 autoreceptors inhibits firing of ventral tegmental dopaminergic neurones in vivo. *Eur J Pharmacol* 275: R7-9.
- Leone P, Pocock D, Wise RA (1991) Morphine-dopamine interaction: ventral tegmental morphine increases nucleus accumbens dopamine release. *Pharmacol Biochem Behav* 39: 469-72.
- Levant B (1997) The D3 dopamine receptor: neurobiology and potential clinical relevance. *Pharmacol Rev* 49: 231-52.
- Liang J, Zheng X, Chen J, Li Y, Xing X, Bai Y, Li Y (2011) Roles of BDNF, dopamine D(3) receptors, and their interactions in the expression of morphine-induced context-specific locomotor sensitization. *Eur Neuropsychopharmacol* 21: 825-34.
- Lv Y, Hu RR, Jing M, Zhao TY, Wu N, Song R, Li J, Hu G (2019) Selective dopamine D3 receptor antagonist YQA14 inhibits morphine-induced behavioral sensitization in wild type, but not in dopamine D3 receptor knockout mice. *Acta Pharmacol Sin* 40: 583-588.
- Manvich DF, Petko AK, Branco RC, Foster SL, Porter-Stransky KA, Stout KA, Newman AH, Miller GW, Paladini CA, Weinshenker D (2019) Selective D2 and D3 receptor

- antagonists oppositely modulate cocaine responses in mice via distinct postsynaptic mechanisms in nucleus accumbens. *Neuropsychopharmacology* 44: 1445-1455.
- Manzanedo C, Aguilar MA, Minarro J (1999) The effects of dopamine D2 and D3 antagonists on spontaneous motor activity and morphine-induced hyperactivity in male mice. *Psychopharmacology (Berl)* 143: 82-8.
- Matsui A, Williams JT (2011) Opioid-sensitive GABA inputs from rostromedial tegmental nucleus synapse onto midbrain dopamine neurons. *J Neurosci* 31: 17729-35.
- McBride WJ, Murphy JM, Ikemoto S (1999) Localization of brain reinforcement mechanisms: intracranial self-administration and intracranial place-conditioning studies. *Behav Brain Res* 101: 129-52.
- McGinnis MM, Siciliano CA, Jones SR (2016) Dopamine D3 autoreceptor inhibition enhances cocaine potency at the dopamine transporter. *J Neurochem* 138: 821-9.
- Mercuri NB, Saiardi A, Bonci A, Picetti R, Calabresi P, Bernardi G, Borrelli E (1997) Loss of autoreceptor function in dopaminergic neurons from dopamine D2 receptor deficient mice. *Neuroscience* 79: 323-7.
- Millan MJ, Dekeyne A, Rivet JM, Dubuffet T, Lavielle G, Brocco M (2000) S33084, a novel, potent, selective, and competitive antagonist at dopamine D(3)-receptors: II. Functional and behavioral profile compared with GR218,231 and L741,626. *J Pharmacol Exp Ther* 293: 1063-73.
- Millan MJ, Peglion JL, Vian J, Rivet JM, Brocco M, Gobert A, Newman-Tancredi A, Dacquet C, Bervoets K, Girardon S, et al. (1995) Functional correlates of dopamine D3 receptor activation in the rat in vivo and their modulation by the selective antagonist, (+)-S 14297: 1. Activation of postsynaptic D3 receptors mediates hypothermia, whereas blockade of D2 receptors elicits prolactin secretion and catalepsy. *J Pharmacol Exp Ther* 275: 885-98.
- Missale C, Nash SR, Robinson SW, Jaber M, Caron MG (1998) Dopamine receptors: from structure to function. *Physiol Rev* 78: 189-225.
- Moore RY, Bloom FE (1978) Central catecholamine neuron systems: anatomy and physiology of the dopamine systems. *Annu Rev Neurosci* 1: 129-69.
- Pert A, Sivit C (1977) Neuroanatomical focus for morphine and enkephalin-induced hypermotility. *Nature* 265: 645-7.
- Phillips AG, LePiane FG, Fibiger HC (1983) Dopaminergic mediation of reward produced by direct injection of enkephalin into the ventral tegmental area of the rat. *Life Sci* 33: 2505-11.
- Pierce RC, Kumaresan V (2006) The mesolimbic dopamine system: the final common pathway for the reinforcing effect of drugs of abuse? *Neurosci Biobehav Rev* 30: 215-38.
- Pontieri FE, Tanda G, Di Chiara G (1995) Intravenous cocaine, morphine, and amphetamine preferentially increase extracellular dopamine in the "shell" as compared with the "core" of the rat nucleus accumbens. *Proc Natl Acad Sci U S A* 92: 12304-8.
- Reavill C, Taylor SG, Wood MD, Ashmeade T, Austin NE, Avenell KY, Boyfield I, Branch CL, Cilia J, Coldwell MC, Hadley MS, Hunter AJ, Jeffrey P, Jewitt F, Johnson CN, Jones DN, Medhurst AD, Middlemiss DN, Nash DJ, Riley GJ, Routledge C, Stemp G, Thewlis KM, Trail B, Vong AK, Hagan JJ (2000) Pharmacological actions of a novel, high-affinity, and selective human dopamine D(3) receptor antagonist, SB-277011-A. *J Pharmacol Exp Ther* 294: 1154-65.



- Reiner DJ, Fredriksson I, Lofaro OM, Bossert JM, Shaham Y (2019) Relapse to opioid seeking in rat models: behavior, pharmacology and circuits. *Neuropsychopharmacology* 44: 465-477.
- Ritz MC, Lamb RJ, Goldberg SR, Kuhar MJ (1987) Cocaine receptors on dopamine transporters are related to self-administration of cocaine. *Science* 237: 1219-23.
- Rodriguez-Arias M, Broseta I, Aguilar MA, Minarro J (2000) Lack of specific effects of selective D(1) and D(2) dopamine antagonists vs. risperidone on morphine-induced hyperactivity. *Pharmacol Biochem Behav* 66: 189-97.
- Rouge-Pont F, Usiello A, Benoit-Marand M, Gonon F, Piazza PV, Borrelli E (2002) Changes in extracellular dopamine induced by morphine and cocaine: crucial control by D2 receptors. *J Neurosci* 22: 3293-301.
- Sanberg PR, Bunsey MD, Giordano M, Norman AB (1988) The catalepsy test: its ups and downs. *Behav Neurosci* 102: 748-59.
- Schilwein S, Agmo A, Huston JP, Schwarting RK (1998) Intraaccumbens injections of substance P, morphine and amphetamine: effects on conditioned place preference and behavioral activity. *Brain Res* 790: 185-94.
- Shippenberg TS, Bals-Kubik R, Herz A (1993) Examination of the neurochemical substrates mediating the motivational effects of opioids: role of the mesolimbic dopamine system and D-1 vs. D-2 dopamine receptors. *J Pharmacol Exp Ther* 265: 53-9.
- Smith JE, Guerin GF, Co C, Barr TS, Lane JD (1985) Effects of 6-OHDA lesions of the central medial nucleus accumbens on rat intravenous morphine self-administration. *Pharmacol Biochem Behav* 23: 843-9.
- Sokoloff P, Giros B, Martres MP, Bouthenet ML, Schwartz JC (1990) Molecular cloning and characterization of a novel dopamine receptor (D3) as a target for neuroleptics. *Nature* 347: 146-51.
- Sokoloff P, Le Foll B (2017) The dopamine D3 receptor, a quarter century later. *Eur J Neurosci* 45: 2-19.
- Sorge RE, Stewart J (2006) The effects of long-term chronic buprenorphine treatment on the locomotor and nucleus accumbens dopamine response to acute heroin and cocaine in rats. *Pharmacol Biochem Behav* 84: 300-5.
- Spanagel R, Herz A, Shippenberg TS (1992) Opposing tonically active endogenous opioid systems modulate the mesolimbic dopaminergic pathway. *Proc Natl Acad Sci U S A* 89: 2046-50.
- Spangler R, Goddard NL, Avena NM, Hoebel BG, Leibowitz SF (2003) Elevated D3 dopamine receptor mRNA in dopaminergic and dopaminoreceptive regions of the rat brain in response to morphine. *Brain Res Mol Brain Res* 111: 74-83.
- Spyraki C, Fibiger HC, Phillips AG (1983) Attenuation of heroin reward in rats by disruption of the mesolimbic dopamine system. *Psychopharmacology (Berl)* 79: 278-83.
- Staley JK, Mash DC (1996) Adaptive increase in D3 dopamine receptors in the brain reward circuits of human cocaine fatalities. *J Neurosci* 16: 6100-6.
- Stinus L, Koob GF, Ling N, Bloom FE, Le Moal M (1980) Locomotor activation induced by infusion of endorphins into the ventral tegmental area: evidence for opiate-dopamine interactions. *Proc Natl Acad Sci U S A* 77: 2323-7.
- Stinus L, Winnock M, Kelley AE (1985) Chronic neuroleptic treatment and mesolimbic dopamine denervation induce behavioural supersensitivity to opiates. *Psychopharmacology (Berl)* 85: 323-8.

- Teitelbaum H, Giammatteo P, Mickley GA (1979) Differential effects of localized lesions of n. accumbens on morphine- and amphetamine-induced locomotor hyperactivity in the C57BL/6J mouse. *J Comp Physiol Psychol* 93: 745-51.
- Vaccarino FJ, Corrigan WA (1987) Effects of opiate antagonist treatment into either the periaqueductal grey or nucleus accumbens on heroin-induced locomotor activation. *Brain Res Bull* 19: 545-9.
- Vanderschuren LJ, Kalivas PW (2000) Alterations in dopaminergic and glutamatergic transmission in the induction and expression of behavioral sensitization: a critical review of preclinical studies. *Psychopharmacology (Berl)* 151: 99-120.
- Vezina P, Kalivas PW, Stewart J (1987) Sensitization occurs to the locomotor effects of morphine and the specific mu opioid receptor agonist, DAGO, administered repeatedly to the ventral tegmental area but not to the nucleus accumbens. *Brain Res* 417: 51-8.
- Volkow ND, Jones EB, Einstein EB, Wargo EM (2019) Prevention and Treatment of Opioid Misuse and Addiction: A Review. *JAMA Psychiatry* 76: 208-216.
- Wang B, Luo F, Ge X, Fu A, Han J (2003) Effect of 6-OHDA lesions of the dopaminergic mesolimbic system on drug priming induced reinstatement of extinguished morphine CPP in rats. *Beijing Da Xue Xue Bao Yi Xue Ban* 35: 449-52.
- Wise RA (1989) Opiate reward: sites and substrates. *Neurosci Biobehav Rev* 13: 129-33.
- Yamamoto DJ, Nelson AM, Mandt BH, Larson GA, Rorabaugh JM, Ng CM, Barcomb KM, Richards TL, Allen RM, Zahniser NR (2013) Rats classified as low or high cocaine locomotor responders: a unique model involving striatal dopamine transporters that predicts cocaine addiction-like behaviors. *Neurosci Biobehav Rev* 37: 1738-53.
- You ZB, Bi GH, Galaj E, Kumar V, Cao J, Gadiano A, Rais R, Slusher BS, Gardner EL, Xi ZX, Newman AH (2019) Dopamine D3R antagonist VK4-116 attenuates oxycodone self-administration and reinstatement without compromising its antinociceptive effects. *Neuropsychopharmacology* 44: 1415-1424.
- You ZB, Gao JT, Bi GH, He Y, Boateng C, Cao J, Gardner EL, Newman AH, Xi ZX (2017) The novel dopamine D3 receptor antagonists/partial agonists CAB2-015 and BAK4-54 inhibit oxycodone-taking and oxycodone-seeking behavior in rats. *Neuropharmacology* 126: 190-199.
- Zapata A, Kivell B, Han Y, Javitch JA, Bolan EA, Kuraguntla D, Jaligam V, Oz M, Jayanthi LD, Samuvel DJ, Ramamoorthy S, Shippenberg TS (2007) Regulation of dopamine transporter function and cell surface expression by D3 dopamine receptors. *J Biol Chem* 282: 35842-54.
- Zocchi A, Girlanda E, Varnier G, Sartori I, Zanetti L, Wildish GA, Lennon M, Mugnaini M, Heidbreder CA (2003) Dopamine responsiveness to drugs of abuse: A shell-core investigation in the nucleus accumbens of the mouse. *Synapse* 50: 293-302.



## Figure Legends

**Fig. 1** Effects of the highly-selective D<sub>3</sub>R antagonist PG01037 on acute morphine-induced locomotor activity. **a** Total ambulations in the 30-min period immediately following administration of 10.0 mg/kg PG01037 (filled symbol) or its vehicle (open symbol). \*  $P < 0.05$ , 10.0 mg/kg PG01037 compared to vehicle. **b** Total ambulations in the 2-hr period immediately following administration of morphine (10 – 56 mg/kg). 30 min prior to morphine injection, animals had been pretreated with either 10.0 mg/kg PG01037 (filled symbols) or its vehicle (open symbols). \*\*  $P < 0.01$ , \*\*\*  $P < 0.001$ , 10.0 mg/kg PG01037 compared to vehicle within each dose of morphine. Each data point represents mean  $\pm$  SEM total ambulations. For both panels **a** and **b**, all subjects received all treatments ( $n = 8$ )

**Fig. 2** Time course of locomotor activity following pretreatment with the highly-selective D<sub>3</sub>R antagonist PG01037 and subsequent administration of morphine. 10.0 mg/kg PG01037 (filled symbols) or its vehicle (open symbols) were administered 30 min prior to **a** 10 mg/kg morphine, **b** 18 mg/kg morphine, or **c** 56 mg/kg morphine. Each data point represents mean  $\pm$  SEM ambulations recorded in 5-min bins. Arrows indicate time of pretreatment injection (“Veh/PG”, i.e. vehicle or 10.0 mg/kg PG01037 respectively) or morphine. All mice received all treatments ( $n = 8$ )

**Fig. 3** Effects of the selective D<sub>2</sub>R antagonist L-741,626 on acute morphine-induced locomotor activity. **a** Total ambulations in the 30-min period immediately following administration of 10.0 mg/kg L-741,626 (shaded symbol) or its vehicle (open symbol). **b** Total ambulations in the 2-hr period immediately following administration of morphine (10 – 56 mg/kg). 30 min prior to

morphine injection, animals had been pretreated with either 10.0 mg/kg L-741,626 (shaded symbols) or its vehicle (open symbols). \*\*\*\*  $P < 0.0001$ , main effect of 10.0 mg/kg L-741,626 compared to vehicle (collapsed across morphine doses). Each data point represents mean  $\pm$  SEM total ambulations. For both panels **a** and **b**, all subjects received all treatments ( $n = 8$ )

**Fig. 4** Time course of locomotor activity following pretreatment with the selective D<sub>2</sub>R antagonist L-741,626 and subsequent administration of morphine. 10.0 mg/kg L-741,626 (shaded symbols) or its vehicle (open symbols) were administered 30 min prior to **a** 10 mg/kg morphine, **b** 18 mg/kg morphine, or **c** 56 mg/kg morphine. Each data point represents mean  $\pm$  SEM ambulations recorded in 5-min bins. Arrows indicate time of pretreatment injection (“Veh/L7”, i.e. vehicle or 10.0 mg/kg L-741,626 respectively) or morphine. All mice received all treatments ( $n = 8$ )

**Fig. 5** Effects of the highly-selective D<sub>3</sub>R antagonist PG01037 on morphine-induced locomotor sensitization. Mice received the combination of either 10.0 mg/kg PG01037 + 56.0 mg/kg morphine or vehicle + 56.0 mg/kg morphine daily for 5 days. One week later (day 12), all mice received vehicle pretreatment 30 min prior to a challenge with 56.0 mg/kg morphine. Shown for days 1-5 are the total number of ambulations in the 2-hr period following injection of 56.0 mg/kg morphine, which was administered 30 min after pretreatment with either 10.0 mg/kg PG01037 (filled symbols) or its vehicle (open symbols). Shown on day 12 are total ambulations in the 2-hr period following administration of 56.0 mg/kg morphine in mice pretreated with 10.0 mg/kg PG01037 during induction (filled symbols) or mice pretreated with vehicle during induction (open symbols). ##  $P < 0.01$ , #####  $P < 0.0001$ , significant difference compared to Day

1 (collapsed across pretreatment doses). \*  $P < 0.05$ , main effect of pretreatment dose (collapsed across days 1-5). N.S., not significant

**Fig. 6** Time course of locomotor activity following pretreatment with the selective D<sub>3</sub>R antagonist PG01037 and subsequent administration of 56.0 mg/kg morphine during induction days 1-5 of sensitization, and challenge test with morphine alone one week later. 10.0 mg/kg PG01037 (filled symbols) or its vehicle (open symbols) were administered 30 min prior to 56.0 mg/kg morphine over 5 consecutive days. Shown are mean  $\pm$  SEM ambulations recorded in 5-min bins on **a** day 1, **b** day 2, **c** day 3, **d** day 4, and **e** day 5 of sensitization induction, or **f** challenge day one week later in which 56 mg/kg morphine was administered to all mice after vehicle pretreatment. Arrows indicate time of pretreatment injection (“Veh/PG” i.e. vehicle or 10.0 mg/kg PG01037 respectively) or 56.0 mg/kg morphine.  $n = 8$  per group

**Fig. 7** Effects of the selective D<sub>2</sub>R antagonist L-741,626 on morphine-induced locomotor sensitization. Mice received the combination of either 10.0 mg/kg L-741,626 + 56.0 mg/kg morphine or vehicle + 56.0 mg/kg morphine daily for 5 days. One week later (day 12), all mice received vehicle pretreatment 30 min prior to a challenge with 56.0 mg/kg morphine. Shown for days 1-5 are the total number of ambulations in the 2-hr period following injection of 56.0 mg/kg morphine, which was administered 30 min after pretreatment with either 10.0 mg/kg L-741,626 (shaded symbols) or its vehicle (open symbols). Shown on day 12 are total ambulations in the 2-hr period following administration of 56.0 mg/kg morphine in mice pretreated with 10.0 mg/kg L-741,626 during induction (filled symbols) or mice pretreated with vehicle during induction (open symbols). #####  $P < 0.0001$ , compared to Day 1 in vehicle-treated

mice. \*\*\*\*  $P < 0.0001$ , main effect of pretreatment dose (collapsed across days 1-5).  $\Psi P < 0.05$ , vehicle vs. 10.0 mg/kg L-741,626 on challenge day

**Fig. 8** Time course of locomotor activity following pretreatment with the selective D<sub>2</sub>R antagonist L-741,626 and subsequent administration of 56.0 mg/kg morphine during induction days 1-5 of sensitization, and challenge test with morphine alone one week later. 10.0 mg/kg L-741,626 (shaded symbols) or its vehicle (open symbols) were administered 30 min prior to 56.0 mg/kg morphine over 5 consecutive days. Shown are mean  $\pm$  SEM ambulations recorded in 5-min bins on **a** day 1, **b** day 2, **c** day 3, **d** day 4, and **e** day 5 of sensitization induction, or **f** challenge day one week later in which 56 mg/kg morphine was administered to all mice after vehicle pretreatment. Arrows indicate time of pretreatment injection (“Veh/L7” i.e. vehicle or 10.0 mg/kg L-741,626 respectively) or 56.0 mg/kg morphine.  $n = 8$  per group

**Fig. 9** Catalepsy following administration of the highly-selective D<sub>3</sub>R antagonist PG01037 or the selective D<sub>2</sub>R antagonist L-741,626 alone or in combination with morphine. **a** Mice were pretreated with PG01037 (vehicle or 10 mg/kg) followed 30 min later by administration of 1 of 3 doses of morphine (0, 10, or 56 mg/kg), or 3 mg/kg risperidone followed 30 min later by administration of saline. **b** Mice were pretreated with L-741,626 (vehicle or 10 mg/kg) followed 30 min later by administration of 1 of 3 doses of morphine (0, 10, or 56 mg/kg), or 3 mg/kg risperidone followed 30 min later by administration of saline. \*  $P < 0.05$ , \*\*\*  $P < 0.001$ , \*\*\*\*  $P < 0.0001$ , compared to both “Veh + 10 Morph” and “Veh + 56 Morph” within the same time point. ##  $P < 0.01$ , ###  $P < 0.001$ , compared to “10 L7 + 0 Morph” within the same time point. Each data point represents mean  $\pm$  SEM latency in seconds to withdraw paw in the bar test.

Latencies were measured at 0, 15, 30, 60, and 120 min relative to the second injection. For both panels **a** and **b**, all subjects received all treatments (n = 8/group).

Fig. 1

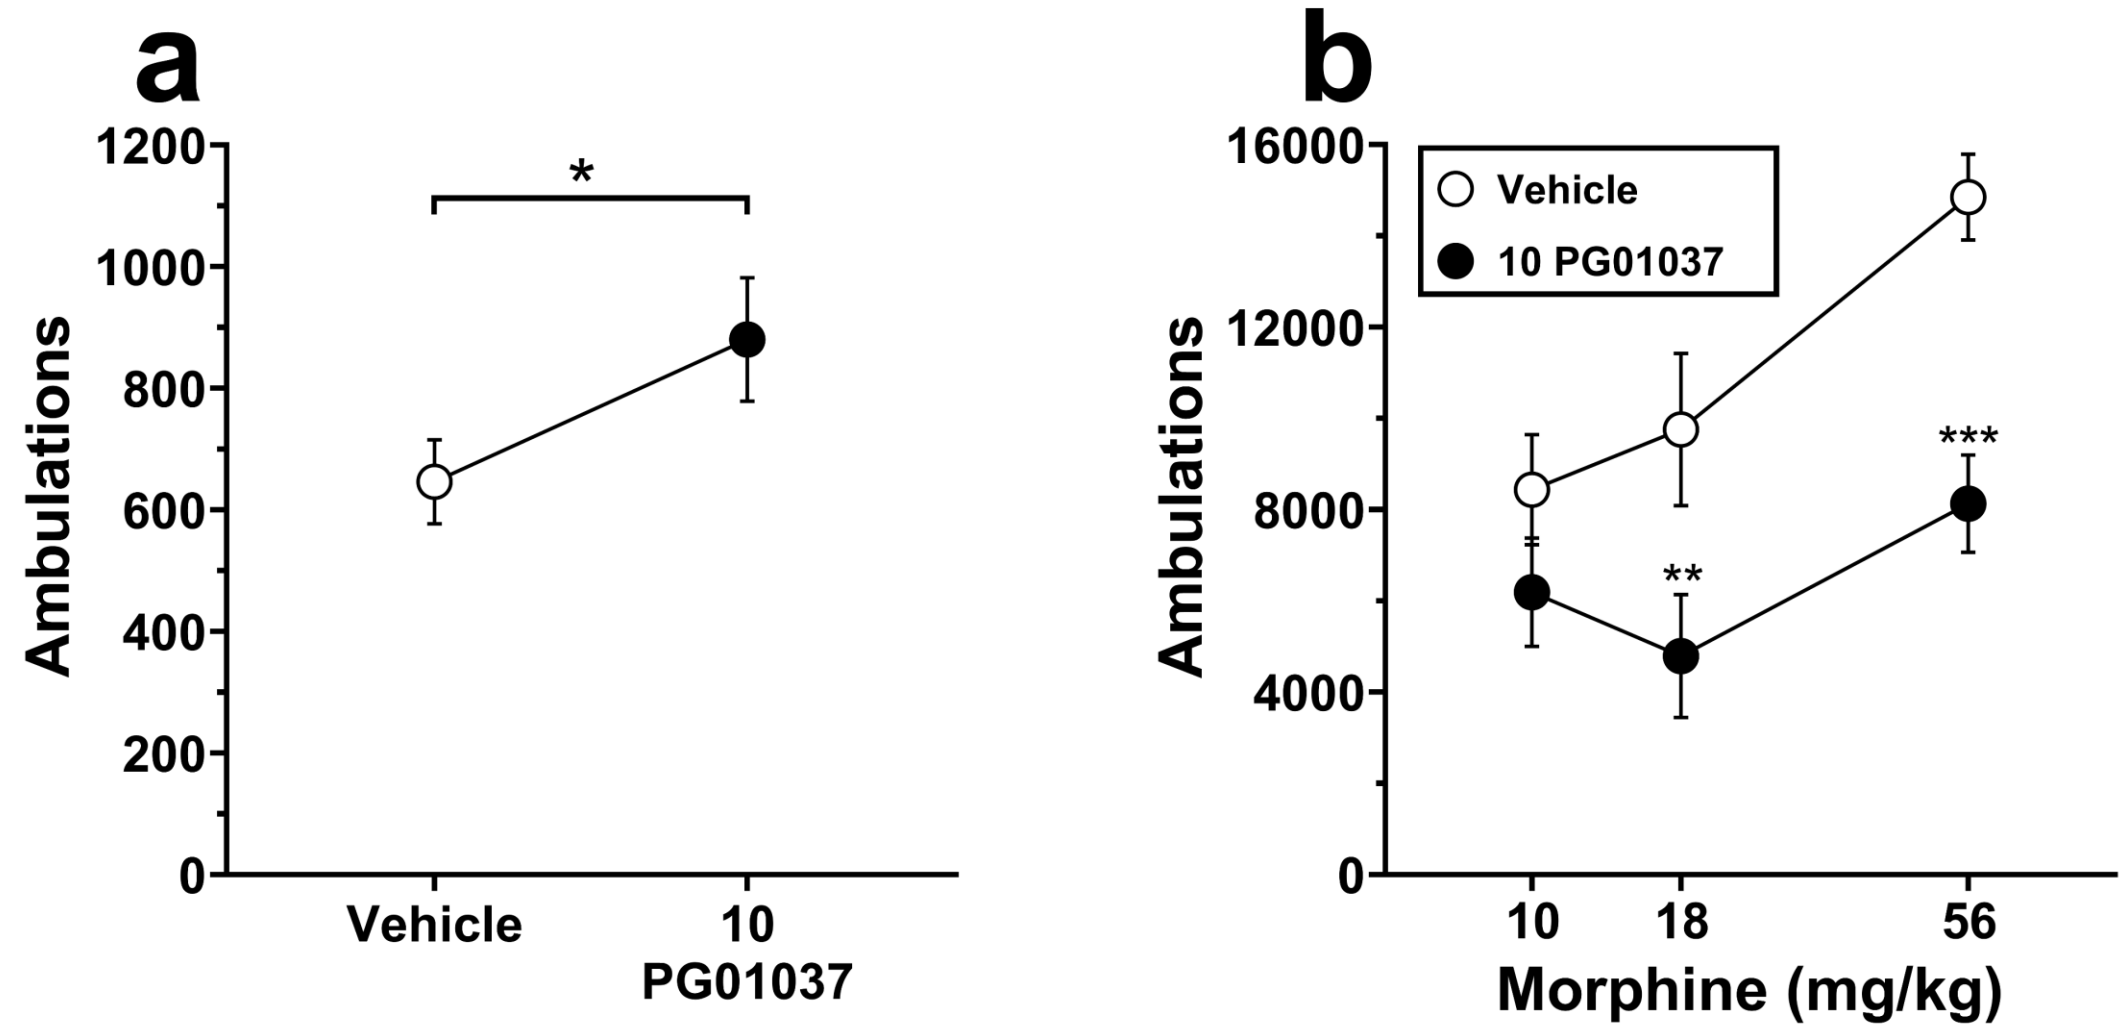

Fig. 2

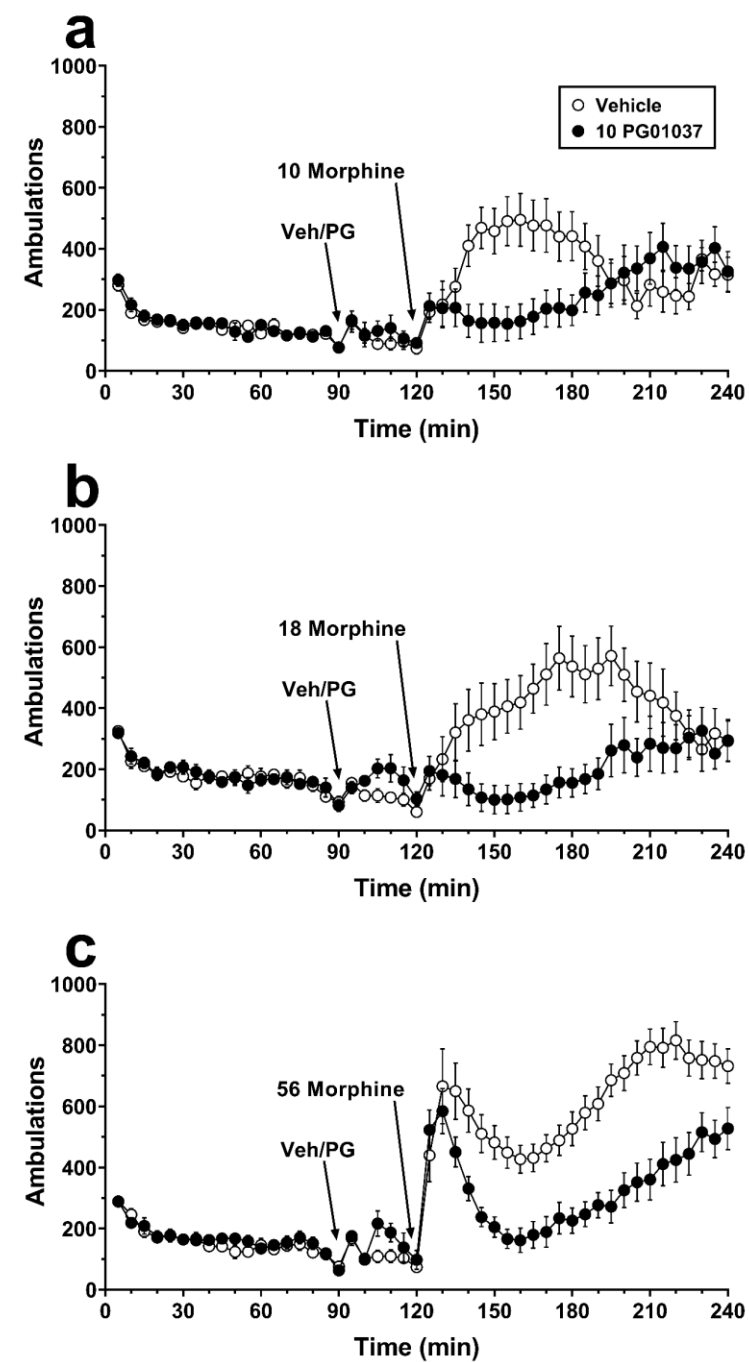

Fig. 3

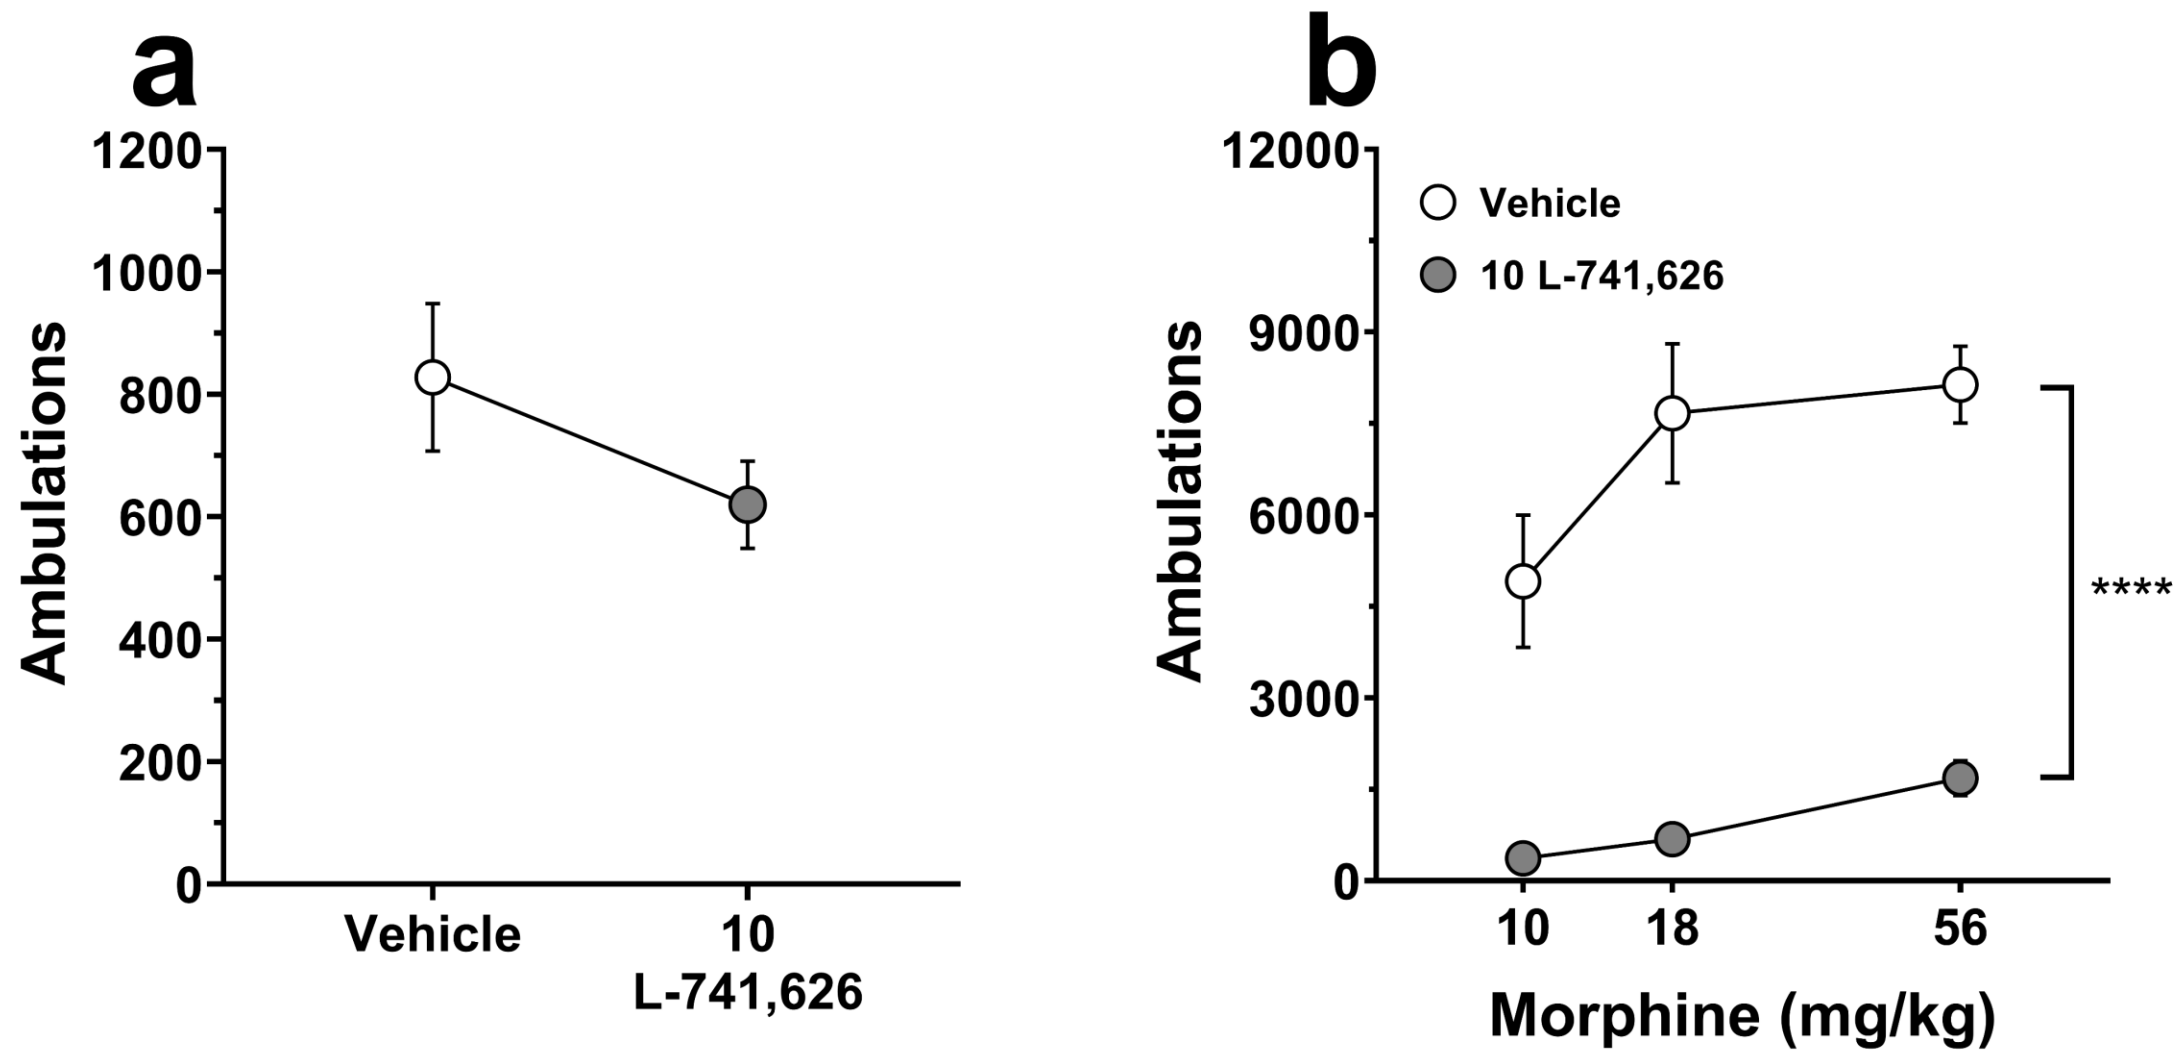



Fig. 4

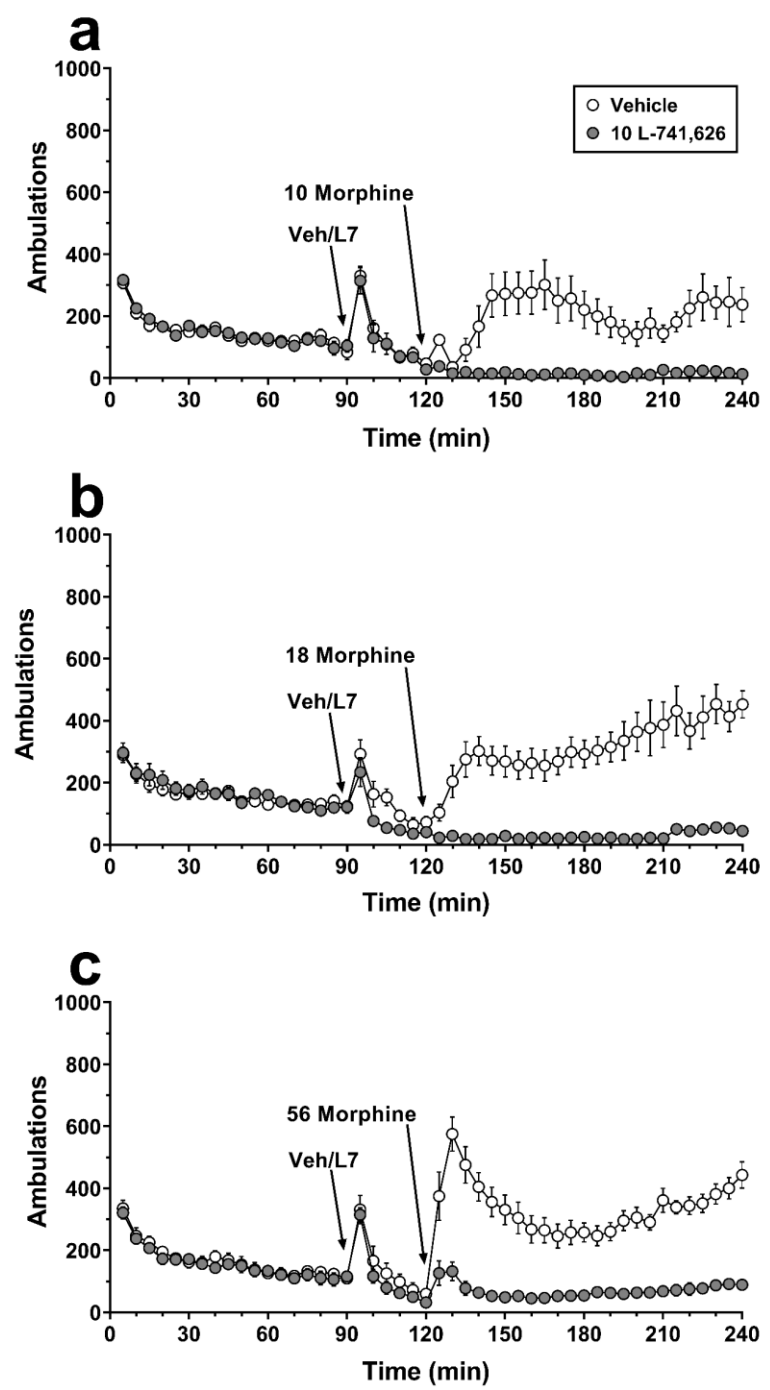

Fig. 5

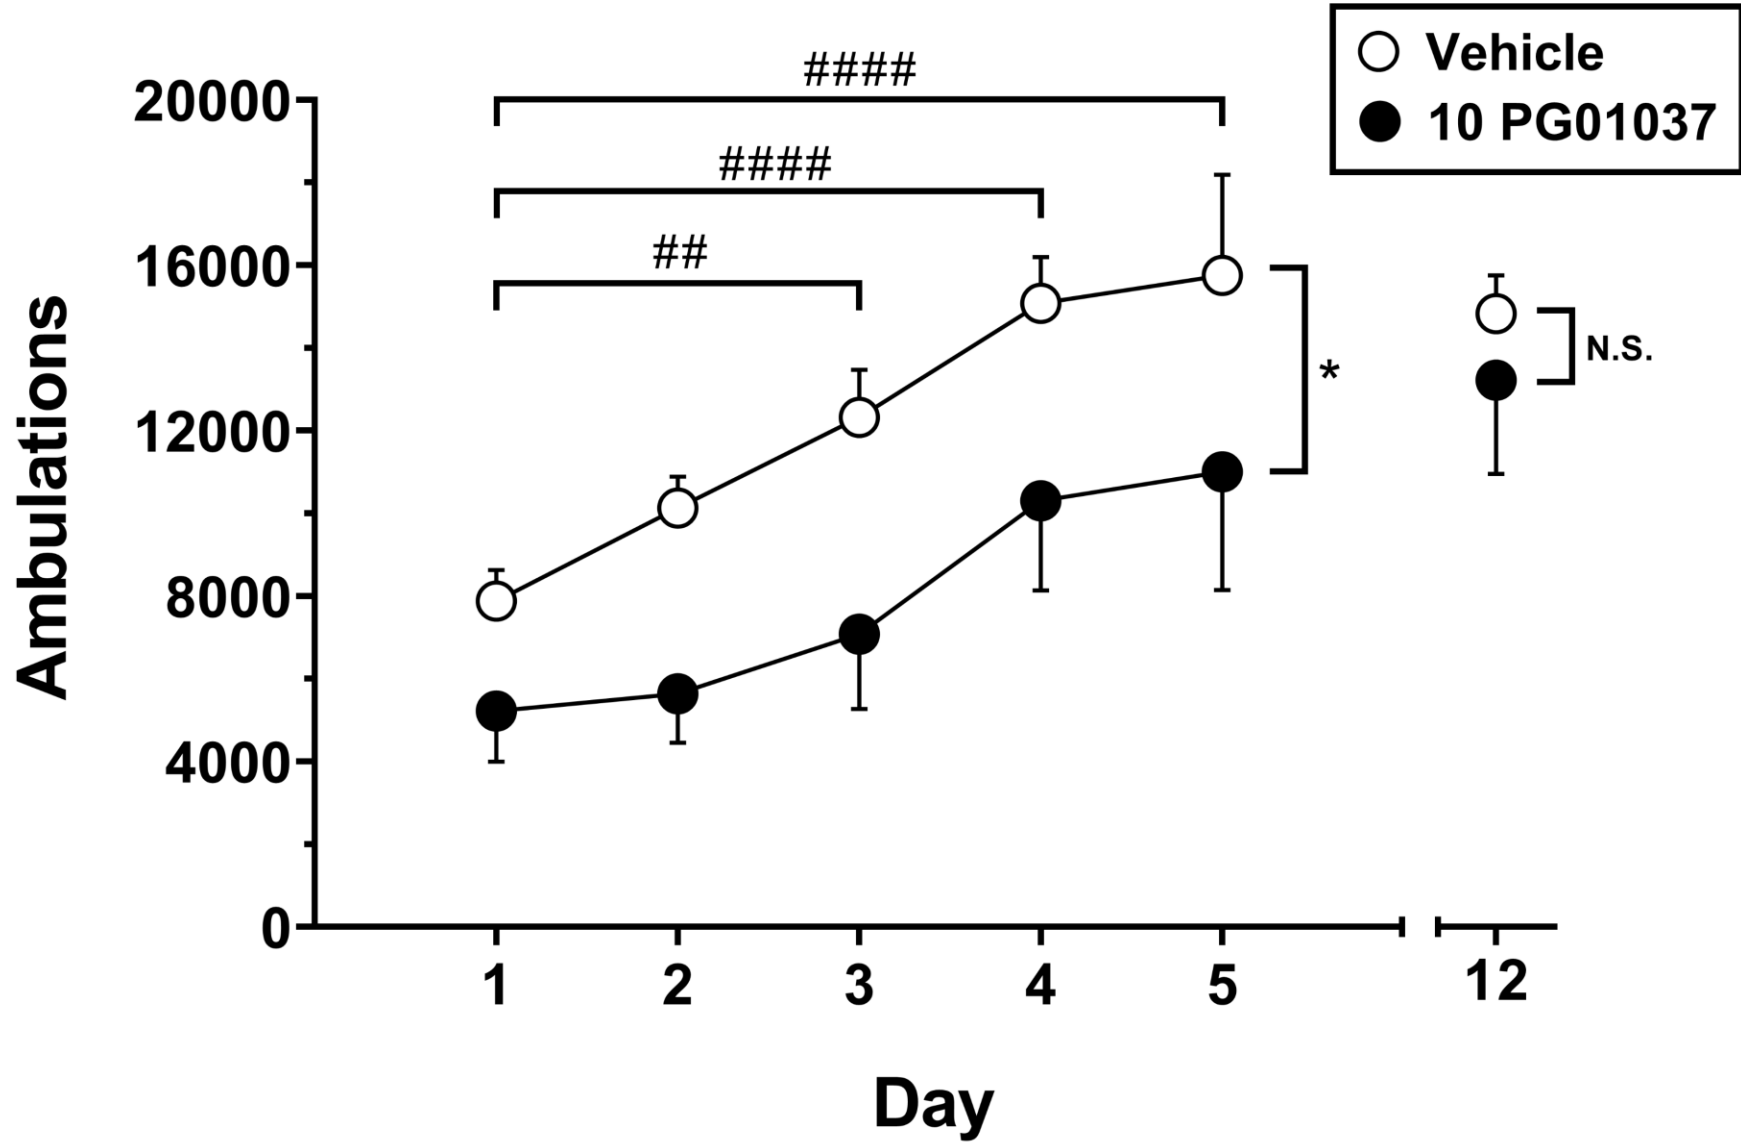

Fig. 6

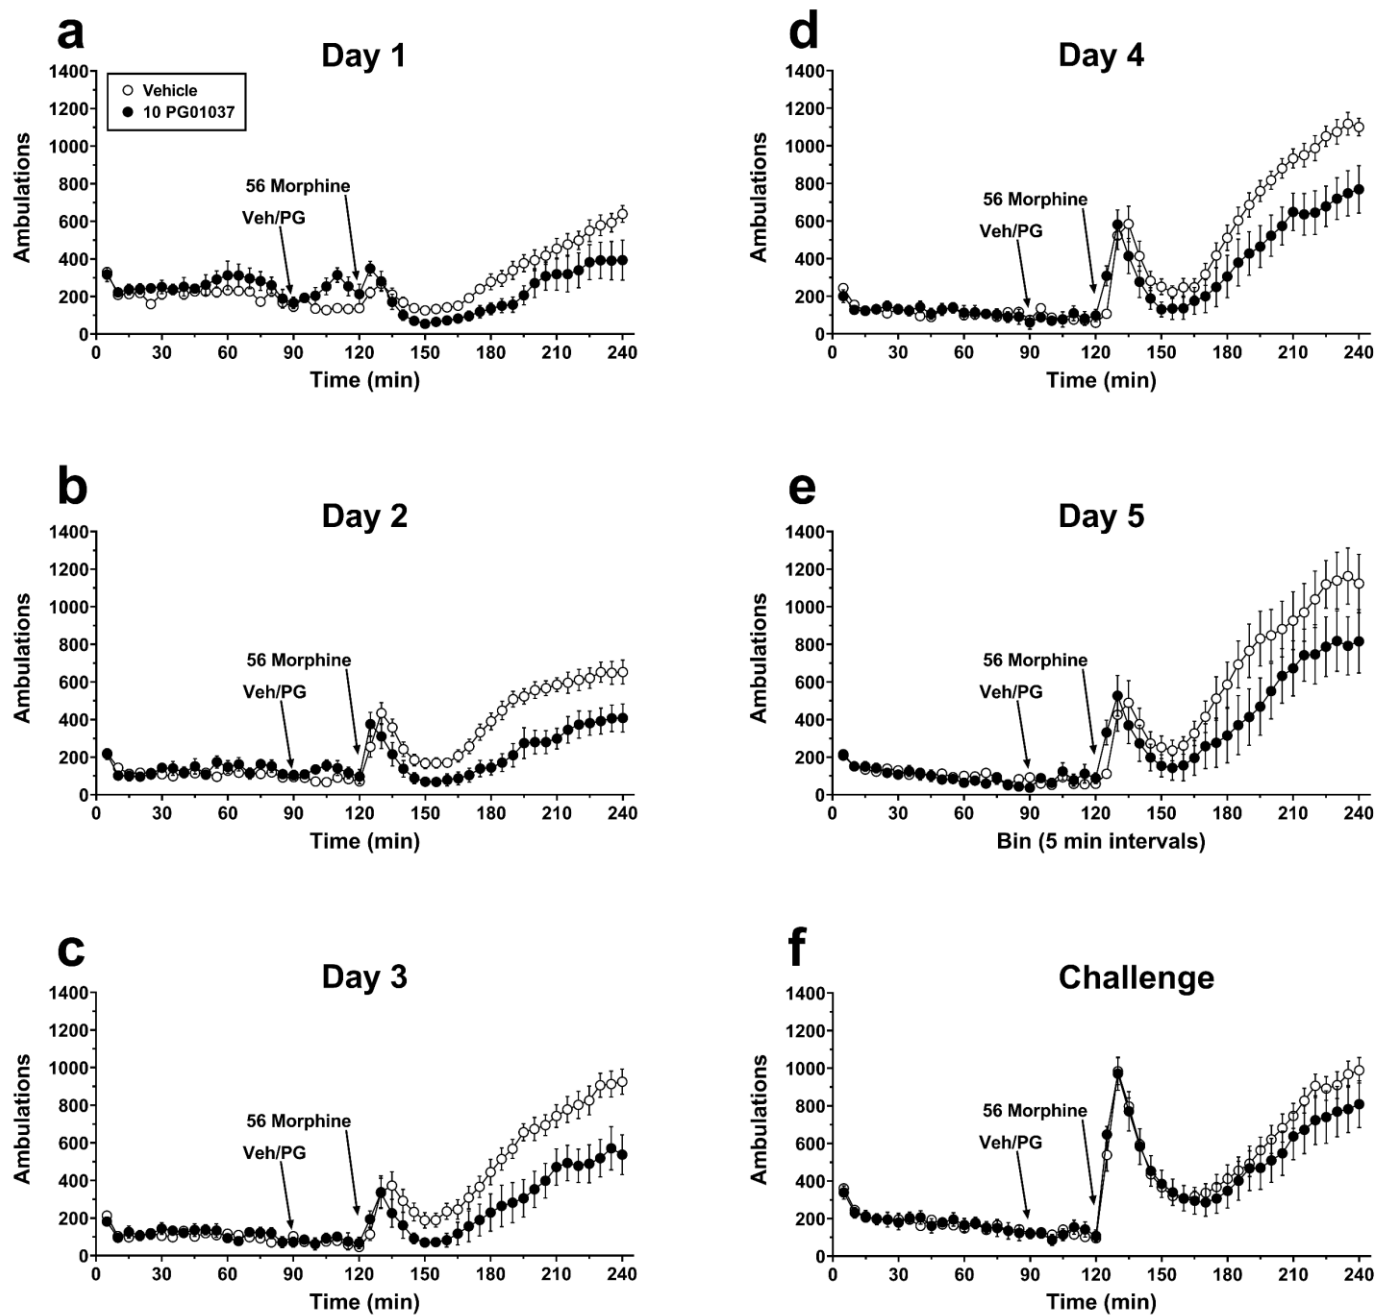

Fig. 7

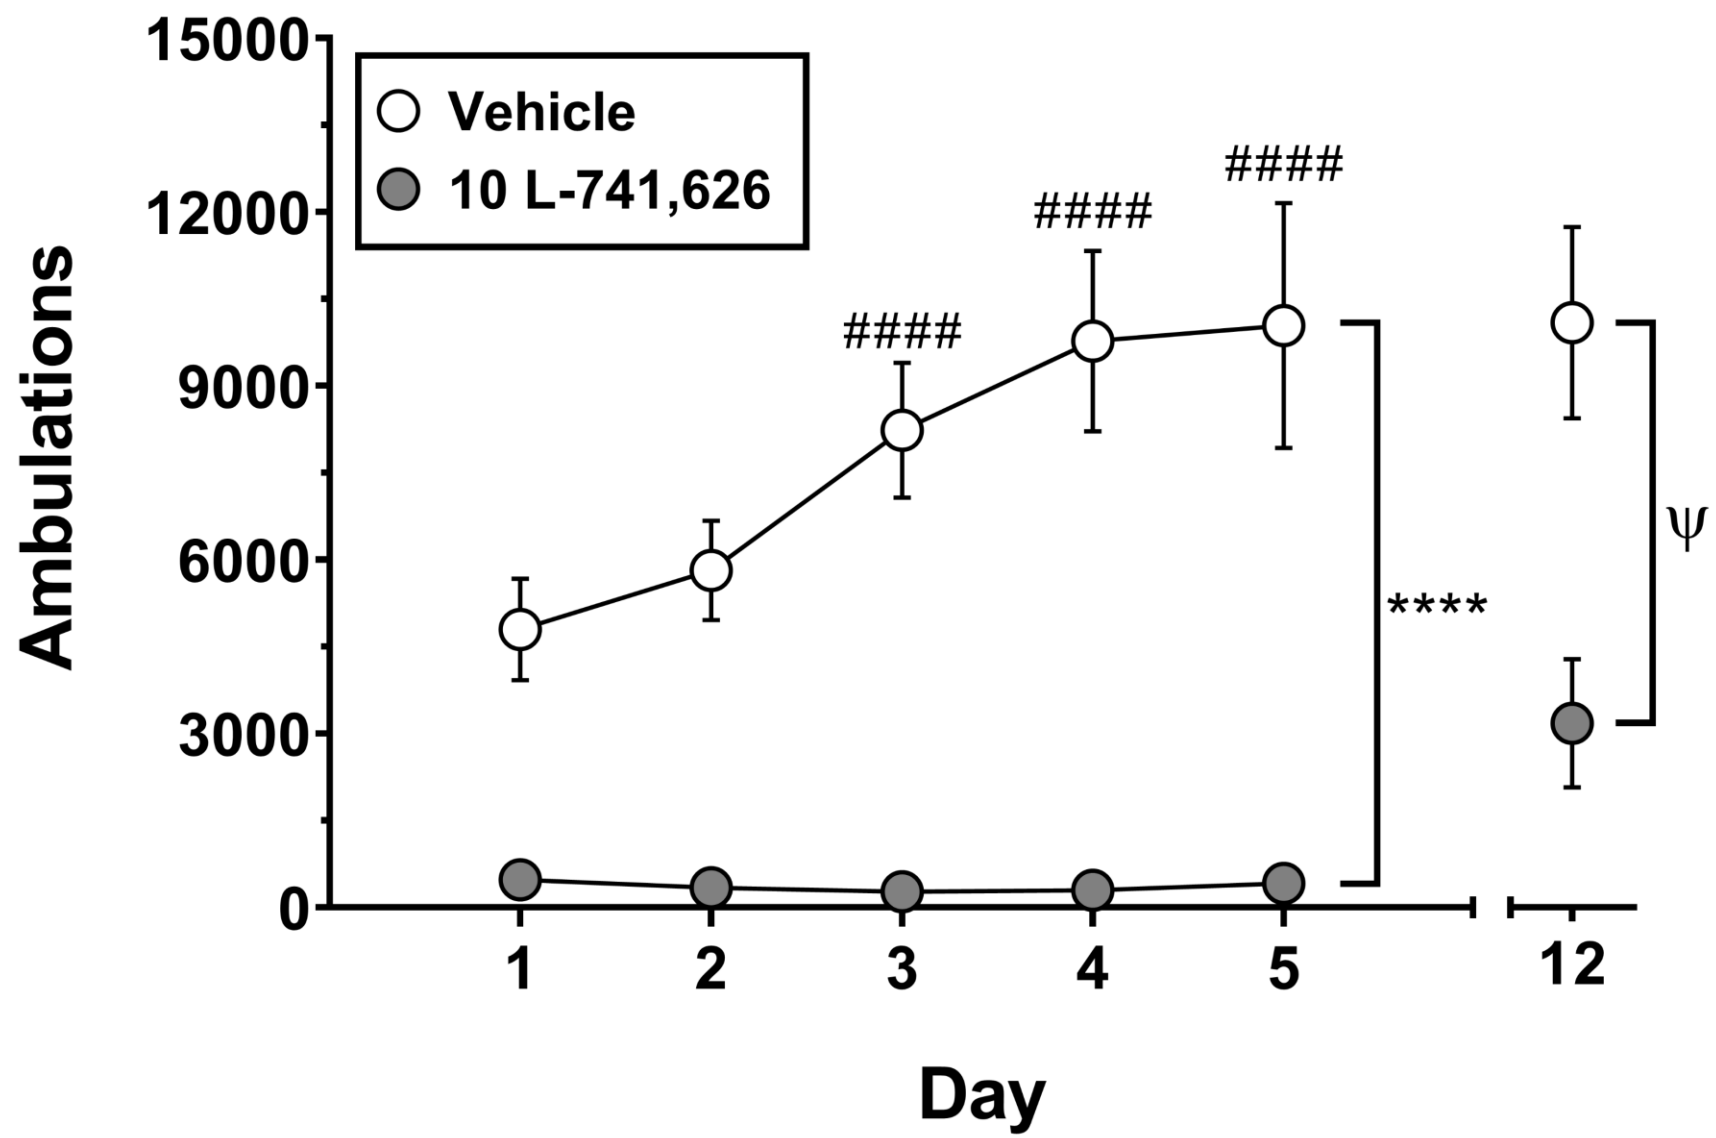

# Fig. 8

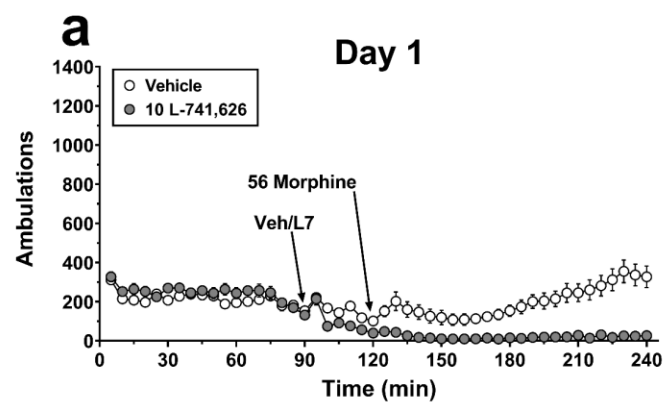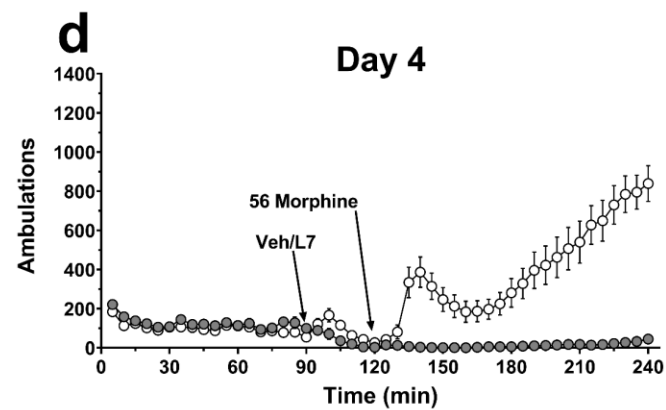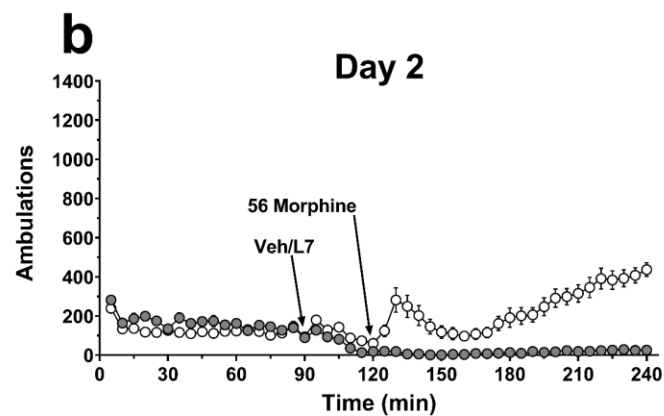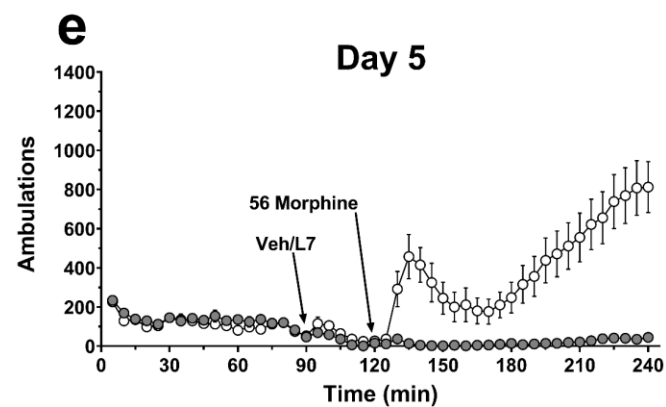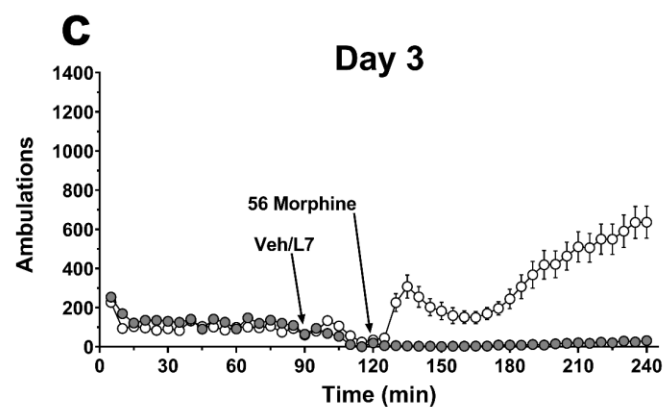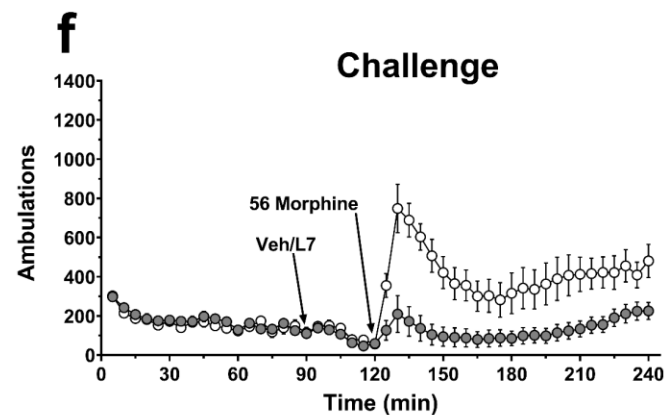

Fig. 9

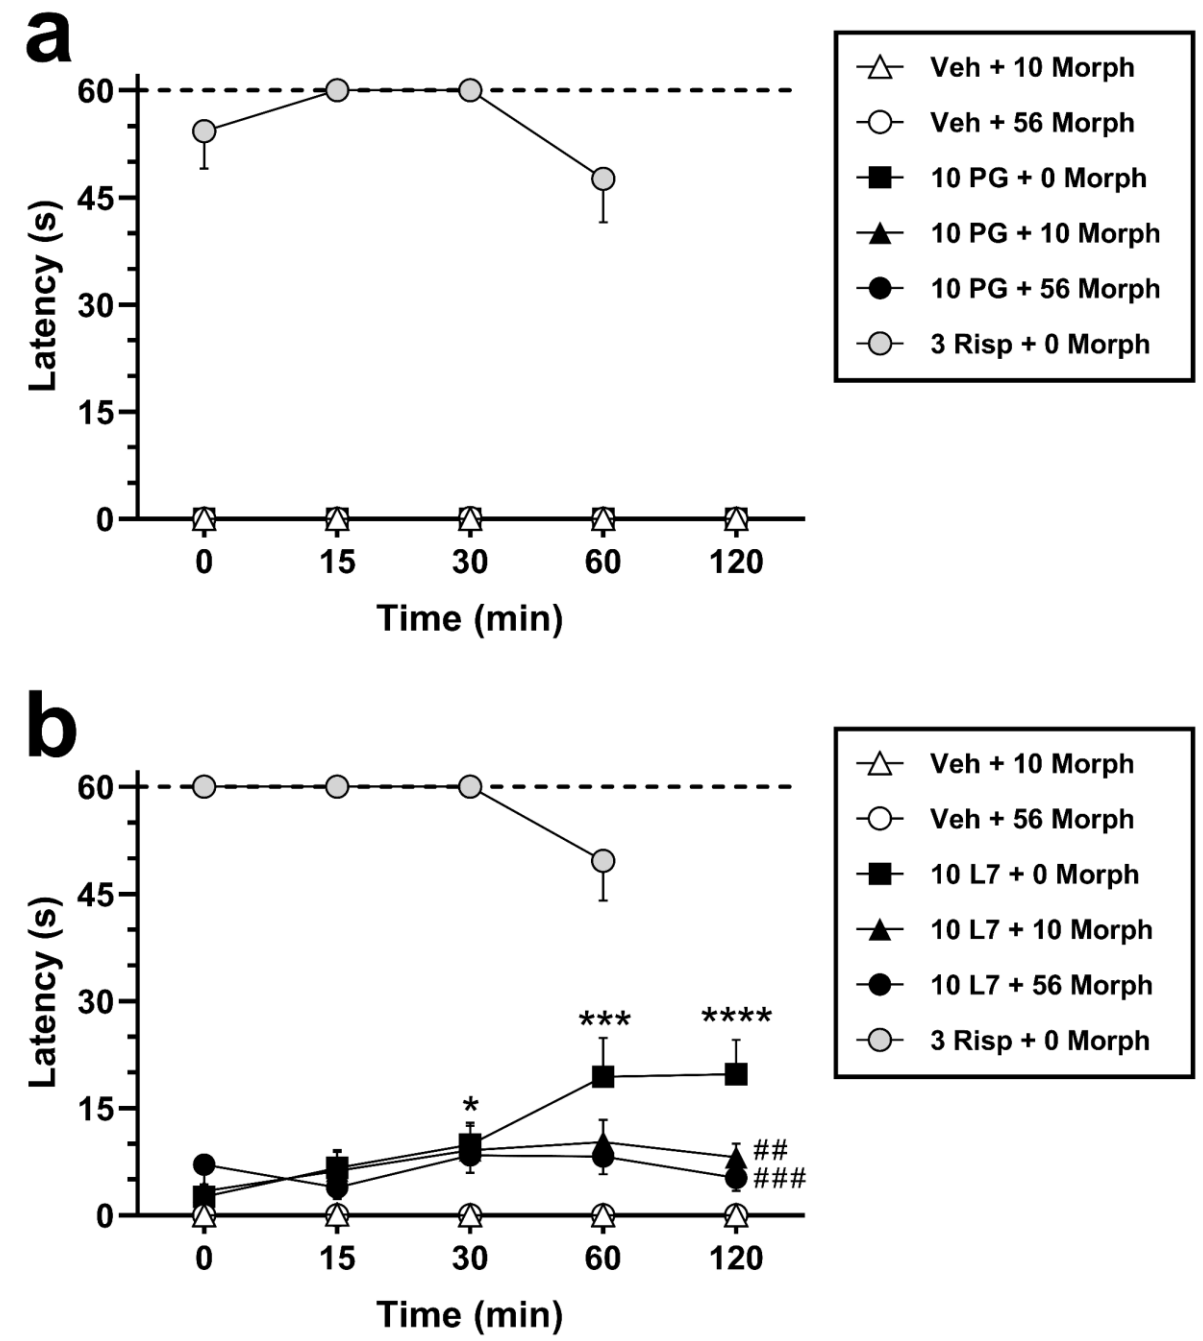

Source: http://biorxiv.org/content/10.1101/2020.04.07.029918v1.full.pdf
